# Supplementary material for: Nationwide observational study of incidence, management and outcome of spontaneous coronary artery dissection: a report from the Swedish Coronary Angiography and Angioplasty register
Source: PubMed Central journal article supplement — BMJ Open. 2022 Jun 1;12(6):e060949. doi: 10.1136/bmjopen-2022-060949 (PMC9161068; doi:10.1136/bmjopen-2022-060949), 2022-06-01
Supplement: bmjopen-2022-060949.draft_revisions.pdf [file bmjopen-2022-060949.draft_revisions.pdf]

# BMJ Open

BMJ Open is committed to open peer review. As part of this commitment we make the peer review history of every article we publish publicly available.

When an article is published we post the peer reviewers' comments and the authors' responses online. We also post the versions of the paper that were used during peer review. These are the versions that the peer review comments apply to.

The versions of the paper that follow are the versions that were submitted during the peer review process. They are not the versions of record or the final published versions. They should not be cited or distributed as the published version of this manuscript.

BMJ Open is an open access journal and the full, final, typeset and author-corrected version of record of the manuscript is available on our site with no access controls, subscription charges or pay-per-view fees (<http://bmjopen.bmj.com>).

If you have any questions on BMJ Open's open peer review process please email [info.bmjopen@bmj.com](mailto:info.bmjopen@bmj.com)

# BMJ Open

## A nationwide observational study of incidence, management and outcome of spontaneous coronary artery dissection - a report from the Swedish Coronary Angiography and Angioplasty register

|                               |                                                                                                                                                                                                                                                                                                                                                                                                                                                                                                                                                                                                                                                                                                                                                                                                                                                                                                                                                                                                                                                                                                                                                                                                                                                                  |
|-------------------------------|------------------------------------------------------------------------------------------------------------------------------------------------------------------------------------------------------------------------------------------------------------------------------------------------------------------------------------------------------------------------------------------------------------------------------------------------------------------------------------------------------------------------------------------------------------------------------------------------------------------------------------------------------------------------------------------------------------------------------------------------------------------------------------------------------------------------------------------------------------------------------------------------------------------------------------------------------------------------------------------------------------------------------------------------------------------------------------------------------------------------------------------------------------------------------------------------------------------------------------------------------------------|
| Journal:                      | <i>BMJ Open</i>                                                                                                                                                                                                                                                                                                                                                                                                                                                                                                                                                                                                                                                                                                                                                                                                                                                                                                                                                                                                                                                                                                                                                                                                                                                  |
| Manuscript ID                 | bmjopen-2022-060949                                                                                                                                                                                                                                                                                                                                                                                                                                                                                                                                                                                                                                                                                                                                                                                                                                                                                                                                                                                                                                                                                                                                                                                                                                              |
| Article Type:                 | Original research                                                                                                                                                                                                                                                                                                                                                                                                                                                                                                                                                                                                                                                                                                                                                                                                                                                                                                                                                                                                                                                                                                                                                                                                                                                |
| Date Submitted by the Author: | 14-Jan-2022                                                                                                                                                                                                                                                                                                                                                                                                                                                                                                                                                                                                                                                                                                                                                                                                                                                                                                                                                                                                                                                                                                                                                                                                                                                      |
| Complete List of Authors:     | <p>Wilander, Henrik; Linköpings universitet, Department of Cardiology and Department of Health, Medicine and Caring Sciences</p> <p>Pagonis, Christos; Linköping University, Department of Cardiology and Department of Health, Medicine and Caring Sciences</p> <p>Venetsanos, Dimitrios; Karolinska Institute, Division of cardiology, Department of Medicine</p> <p>Swahn, Eva; Linköping University, Department of Cardiology and Department of Health, Medicine and Caring Sciences</p> <p>Dworeck, Christian; Institute of Medicine, SU Sahlgrenska, Department of Molecular and Clinical Medicine</p> <p>Johnston, Nina; Uppsala University, Department of Medical Sciences, Cardiology</p> <p>Jonasson, Lena; Linköping University Faculty of Medicine, Department of Cardiology and Department of Health, Medicine and Caring Sciences</p> <p>Kellerth, Thomas; Region Värmland, Department of acute cardiology</p> <p>Tornvall, Per; Karolinska Institute, Cardiology Unit, Department of Clinical Science and Education Södersjukhuset</p> <p>Yndigegn, Troels; Lund University, Department of cardiology</p> <p>Sederholm Lawesson, Sofia; Linköping University, Department of Cardiology and Department of Health, Medicine and Caring Sciences</p> |
| Keywords:                     | Myocardial infarction < CARDIOLOGY, Ischaemic heart disease < CARDIOLOGY, Coronary intervention < CARDIOLOGY                                                                                                                                                                                                                                                                                                                                                                                                                                                                                                                                                                                                                                                                                                                                                                                                                                                                                                                                                                                                                                                                                                                                                     |
|                               |                                                                                                                                                                                                                                                                                                                                                                                                                                                                                                                                                                                                                                                                                                                                                                                                                                                                                                                                                                                                                                                                                                                                                                                                                                                                  |

SCHOLARONE™  
Manuscripts

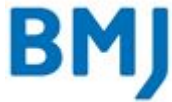

I, the Submitting Author has the right to grant and does grant on behalf of all authors of the Work (as defined in the below author licence), an exclusive licence and/or a non-exclusive licence for contributions from authors who are: i) UK Crown employees; ii) where BMJ has agreed a CC-BY licence shall apply, and/or iii) in accordance with the terms applicable for US Federal Government officers or employees acting as part of their official duties; on a worldwide, perpetual, irrevocable, royalty-free basis to BMJ Publishing Group Ltd ("BMJ") its licensees and where the relevant Journal is co-owned by BMJ to the co-owners of the Journal, to publish the Work in this journal and any other BMJ products and to exploit all rights, as set out in our [licence](#).

The Submitting Author accepts and understands that any supply made under these terms is made by BMJ to the Submitting Author unless you are acting as an employee on behalf of your employer or a postgraduate student of an affiliated institution which is paying any applicable article publishing charge ("APC") for Open Access articles. Where the Submitting Author wishes to make the Work available on an Open Access basis (and intends to pay the relevant APC), the terms of reuse of such Open Access shall be governed by a Creative Commons licence – details of these licences and which [Creative Commons](#) licence will apply to this Work are set out in our licence referred to above.

Other than as permitted in any relevant BMJ Author's Self Archiving Policies, I confirm this Work has not been accepted for publication elsewhere, is not being considered for publication elsewhere and does not duplicate material already published. I confirm all authors consent to publication of this Work and authorise the granting of this licence.

Version: 2021-11-14

# A nationwide observational study of incidence, management and outcome of spontaneous coronary artery dissection - a report from the Swedish Coronary Angiography and Angioplasty register

**Running head:** Spontaneous coronary artery dissection (SCAD) in Sweden

Wilander H,<sup>1</sup> Pagonis C,<sup>1</sup> Venetsanos D,<sup>2</sup> Swahn E,<sup>1</sup> Christian Dworeck,<sup>5</sup> Johnston N,<sup>3</sup> Jonasson L,<sup>1</sup> Kellerth T<sup>7</sup>, Tornvall P,<sup>4</sup> Yndigegn T<sup>6</sup>, Sederholm Lawesson S<sup>1</sup>

## Affiliations

1. Department of Cardiology and Department of Health, Medicine and Caring Sciences, Linköping University, Linköping, Sweden
2. Division of Cardiology, Department of Medicine, Karolinska Institutet Solna and Karolinska University Hospital, Stockholm, Sweden
3. Department of Medical Sciences, Cardiology, University Hospital Uppsala, Uppsala University, Sweden
4. Cardiology Unit, Department of Clinical Science and Education Södersjukhuset/ Karolinska Institutet Sjukhusbacken 10, Stockholm; Sweden
5. Department of Molecular and Clinical Medicine at Institute of Medicine, SU Sahlgrenska, Gothenburg, Sweden
6. Department of Cardiology, Lund University, Skane University Hospital, Lund, Sweden
7. Department of Heart and Lung-physiology, Faculty of Health, Orebro University and University Hospital, Orebro, Sweden

Corresponding author:

Eva Swahn, MD, PhD

Department of Cardiology and Department of Health, Medicine and Caring Sciences, Linköping University, Linköping, Sweden

E-mail: [eva.swahn@liu.se](mailto:eva.swahn@liu.se)

[Twitter handle: @swahn\\_eva](#)

Tel: +46101032170

Word count: 2991

Version: 2021-11-14

1  
2  
3  
4  
5  
6  
7  
8  
9  
10  
11  
12  
13  
14  
15  
16  
17  
18  
19  
20  
21  
22  
23  
24  
25  
26  
27  
28  
29  
30  
31  
32  
33  
34  
35  
36  
37  
38  
39  
40  
41  
42  
43  
44  
45  
46  
47  
48  
49  
50  
51  
52  
53  
54  
55  
56  
57  
58  
59  
60

For peer review only

Version: 2021-11-14

## Abstract

### Objectives

The aim of this study was to conduct a nationwide all comer description of incidence, contemporary management and outcome in Swedish spontaneous coronary artery dissection (SCAD) patients. The incidence of SCAD as well as the management and outcome of these patients is not well described.

### Design

A nationwide observational study.

### Participants and Setting

All patients with SCAD registered in the Swedish coronary angiography and angioplasty register (SCAAR) from 2015 to 2017 were included. The index angiographies of patients with registered SCAD were re-evaluated at each centre to confirm the diagnosis. Patients with non-SCAD MI (n=32 601) were used for comparison.

### Outcome measures

Outcomes included all-cause mortality, re-infarction or acute coronary re-angiography.

### Results

This study found 147 SCAD patients, rendering an incidence of 0.74 per 100.000 per year and a prevalence of 0.43% of all MIs. The average age was 52.9 years, 75.5% were women and 47.6% presented with ST-segment elevation MI. Percutaneous coronary intervention (PCI) was attempted in 40.1% of SCAD patients and 30.6% received stent. The use of anti-thrombotic agents was similar between the groups and there was no difference regarding outcomes, 10.9% vs 13.4%, p=0.75. Mortality was lower in SCAD patients, 2.7% vs 8.0%,

Version: 2021-11-14

1  
2  
3 p = 0.03, whereas SCAD patients more often underwent acute re-angiography, 9.5% vs 4.6%,  
4  
5 p<0.01.  
6  
7

## 8 **Conclusion**

9  
10 In this nationwide, all comer Swedish study, the overall incidence of SCAD was low,  
11  
12 including 25% men which is more and in contrast to previous studies. Compared with non-  
13  
14 SCAD MI, SCAD patients were younger, with lower cardiovascular risk burden, yet suffered  
15  
16 substantial mortality and morbidity and more frequently underwent acute coronary re-  
17  
18 angiography.  
19  
20  
21  
22

## 23 **Key words**

24  
25 Spontaneous coronary artery dissection (SCAD); ACS/NSTE-ACS; STEMI  
26  
27  
28

## 29 **Article Summary**

### 30 31 **Strengths and limitations of this study**

- 32  
33 • All patients in Sweden considered having SCAD during the study period, and all  
34  
35 centers performing invasive coronary angiography are represented.  
36  
37
- 38  
39 • All angiographies where SCAD was reported in the SCAAR registry were reviewed  
40  
41 and validated by an independent interventional cardiologist.  
42  
43
- 44  
45 • All data regarding demographics, management, treatment and in-hospital outcomes are  
46  
47 immediately registered on-line, thus limiting recall bias and missing values as these  
48  
49 variables are compulsory to register.  
50  
51
- 52  
53 • Limitations include possible heterogeneity in the confirmation of SCAD diagnosis as  
54  
55 the study did not include a core-lab.  
56  
57  
58  
59  
60

Version: 2021-11-14

## Introduction

Spontaneous coronary artery dissection (SCAD) has been reported as the underlying cause of myocardial infarction (MI) in 0.2-4% of all cases with an inherent risk of sudden cardiac death.(1, 2) The dissection occurs independently of atherosclerosis causing coronary flow obstruction and acute myocardial ischemia.(3) The majority of SCAD patients are women between 44-53 years.(4, 5) The presence of conventional cardiovascular risk factors is low.(2, 6) Instead, the etiology of SCAD is multifactorial and often includes a pre-existing arteriopathy.(2, 7, 8)

SCAD presenting as Saw type 1 is an angiographic diagnosis, but as SCAD type 3 mimics atherosclerotic coronary artery disease (CAD) and type 2 is difficult to diagnose on angiography, clinical awareness, a high level of suspicion and sometimes intravascular imaging such as intravascular ultrasound (IVUS) or optical coherence tomography (OCT) in these cases is needed.(6, 7) However, these procedures may lead to propagation of the dissection as guidewires can enter the false lumen.(9, 10)

Percutaneous coronary intervention (PCI) also poses a risk of extending the dissection and carries a risk of stent malapposition subsequent to resorption of the intramural hematoma.(1, 4, 5, 9, 11, 12) Additionally, observational data indicate spontaneous healing within days to months after conservative treatment of SCAD.(1, 4, 13) Hence, current recommendation emphasises conservative treatment of patients without ongoing large areas of ischemia or hemodynamic instability.

The absence of randomised controlled trials (RCT) leaves current guidelines based on expert opinion. While SCAD patients treated by PCI should receive standard dual anti-platelet therapy (DAPT) the support for anti-platelet therapy in conservatively managed SCAD is lacking. Long term mortality after SCAD has been reported to be low with survival rates



Version: 2021-11-14

1  
2  
3 between 92-100% after 3-6 years follow up.(4, 14) On the other hand SCAD recurrence has  
4  
5 been reported in 10-17% during 3-4 years of follow up.(12, 15)  
6  
7

8 Although better recognised recently,(16-18) SCAD still remains insufficiently studied as there  
9  
10 are no nationwide reports on SCAD MIs relative to type 1 MIs, registered in the same period.  
11  
12 Thus, the aim was to study a Swedish all-comer MI population undergoing coronary  
13  
14 angiography, describing incidence, prevalence, medical and invasive management and  
15  
16 cardiovascular outcomes of SCAD compared with non-SCAD MI.  
17  
18  
19

## 20 Method

### 21 Study population

22  
23 This was a retrospective analysis of prospectively collected data using the Swedish coronary  
24  
25 angiography and angioplasty registry (SCAAR) (19). Between 17<sup>th</sup> of December 2015 and  
26  
27 30<sup>th</sup> of December 2017 all consecutive patients with recorded SCAD, were identified using  
28  
29 the SCAD variable launched in SCAAR on 15<sup>th</sup> of December 2015. Patients with non-SCAD  
30  
31 MI who underwent coronary angiography during the same time period were used for  
32  
33 comparison.  
34  
35  
36  
37  
38

### 39 SCAAR registry

40  
41 The registry has previously been described, and covers 100% of patients undergoing coronary  
42  
43 angiography and PCI in Sweden. Data on baseline characteristics, medical history, procedural  
44  
45 characteristics and in-hospital complications are prospectively collected. SCAAR is a part of  
46  
47 the Swedish Web-system for Enhancement and Development of Evidence based care in Heart  
48  
49 disease Evaluated According to Recommended Therapies (SWEDEHEART). (19)  
50  
51  
52

53  
54 Ongoing medication on arrival and at discharge were obtained by merging SCAAR with the  
55  
56 Swedish register of information and knowledge about Swedish heart intensive care  
57  
58 admissions (RIKS-HIA), another part of SWEDEHEART.  
59  
60

Version: 2021-11-14

### Angiographic SCAD diagnosis

All index angiographies of patients with SCAD were re-evaluated by an independent interventional cardiologist at each center to confirm the diagnosis. Patients without confirmed SCAD were excluded. SCAD was defined according to the Saw angiographic classification of SCAD. (Supplementary Table 1) Coronary artery dissections evaluated as secondary to atherosclerotic plaque rupture or iatrogenic dissections were excluded.

### Definition of outcomes and complications

The primary outcomes of this study were all-cause mortality, myocardial re-infarction, and acute invasive coronary re-angiography. Recurrent MI was defined as readmission according to the International Classification of Diseases (ICD) codes I21 and I22. Acute re-angiography was defined as an unplanned new coronary angiography after the index event. Information about all-cause mortality and MI were obtained by merging SCAAR with the national population registry and RIKS-HIA, respectively. Data about re-angiography and PCI were derived from SCAAR. Follow up for death and MI was available until June 2018 and for coronary re-angiography until January 2018.

### Ethics

All patients were informed of their participation in the SCAAR registry, and their possibility to withdraw their consent at any time. Anyhow, according to Swedish regulations, written informed consent is not required for registration in national quality registries such as SCAAR. Permission for the study was obtained from the regional Ethical Review Board, Linköping, Sweden (Dnr 2018/122-31), and complied with the Declaration of Helsinki. Patient data were anonymised to protect integrity.

### Statistical analysis

Data are presented as numbers and percentages, mean  $\pm$  standard deviations, or median with interquartile range, as appropriate. Comparisons of continuous variables were performed with the Student T-test, when normal distribution was present, otherwise the Mann Whitney U test

Version: 2021-11-14

1  
2  
3 was used. Comparison of categorical variables between groups was performed using the Chi<sup>2</sup>  
4  
5 test. Rate of cardiovascular events over time is presented using Kaplan-Meier curves and  
6  
7 outcome comparisons were performed using the log-rank tests. Any p-value <0.05 is  
8  
9 considered to indicate statistical significance. The overall proportion of missing data was low,  
10  
11 <2.5% of patients regardless of variable, except for smoking status which was missing in  
12  
13 7.2% of patients with non-SCAD MI. IBM SPSS statistics version 25 was used.  
14  
15  
16  
17

## 18 Patient and Public Involvement

19  
20  
21 Patients or the public were not involved in the design, or conduct, or reporting, or  
22  
23 dissemination plans of our research.  
24  
25  
26  
27  
28  
29  
30

## 31 Results

### 32 Patient characteristics

33  
34 In total, 264 patients from 30 centers were identified in SCAAR with an initial SCAD  
35  
36 diagnosis alongside 32 601 patients with non-SCAD MI. After re-evaluating angiograms of  
37  
38 all patients with registered definite or suspected SCAD, the diagnosis of definite SCAD was  
39  
40 confirmed in 147 patients from 24 centers. According to Statistics Sweden, the average  
41  
42 population in Sweden in the years 2015-2017 was 9 985 629 individuals, rendering an  
43  
44 incidence of SCAD at 0.74 per 100.000 per year and a prevalence of 0.43% of all MI cases  
45  
46 undergoing coronary angiography in Sweden at the same time. The prevalence of SCAD was  
47  
48 2.2% in the MI population <50 years, (7.3% and 0.8% in women and men respectively).  
49  
50 With a mean age of 52.9 years, SCAD patients were younger than patients with non-SCAD  
51  
52 MI, 68.5 year (p<0.01). The SCAD group consisted of 75.5% women compared to 31.9% of  
53  
54 the non-SCAD MI group. The prevalence of cardiovascular risk factors, use of acetylsalicylic  
55  
56  
57  
58  
59  
60

Version: 2021-11-14

acid (ASA), statins and anti-hypertensive medications on admission was lower in the SCAD group. (Table 1)

Table 1. Baseline characteristics in SCAD and non-SCAD myocardial infarction (MI)

|                              | SCAD MI<br>n=147<br>n (%) | Non-SCAD MI<br>n=32601<br>n (%) | p-value |
|------------------------------|---------------------------|---------------------------------|---------|
| Age                          | 52.9 ±12.2                | 68.5 ±11.8                      | <0.01   |
| Female gender                | 111 (75.5)                | 10391 (31.9)                    | <0.01   |
| Diabetes                     | 3 (2.0)                   | 6921 (21.4)                     | <0.01   |
| Hypertension <sup>1</sup>    | 39 (26.5)                 | 19070 (59.4)                    | <0.01   |
| Hyperlipidemia <sup>2</sup>  | 20 (13.7)                 | 9125 (30.4)                     | <0.01   |
| Smoking history <sup>3</sup> | 56 (38.1)                 | 17599 (58.1)                    | <0.01   |
| Previous MI                  | 16 (10.9)                 | 6733 (21.1)                     | <0.01   |
| Previous CABG                | 0                         | 1996 (6.1)                      | <0.01   |
| Previous PCI                 | 6 (4.1)                   | 5482 (16.8)                     | <0.01   |
| ACE-I or ARBs                | 26 (17.7)                 | 11904 (36.5)                    | <0.01   |
| Beta-blockers                | 25 (17.1)                 | 10107 (33.7)                    | <0.01   |
| ASA                          | 27 (18.5)                 | 8577 (28.6)                     | <0.01   |
| P2Y <sub>12</sub> -inhibitor | 4 (2.7)                   | 1642 (5.5)                      | 0.15    |
| DAPT                         | 3 (2.1)                   | 951 (3.2)                       | 0.44    |
| OAC                          | 7 (4.8)                   | 2426 (7.6)                      | 0.21    |
| Statins                      | 20 (13.7)                 | 9125 (30.4)                     | <0.01   |

ACE-I = Angiotensin Converting Enzyme Inhibitor, ARB= Angiotensin Receptor Blocker, ASA = Acetyl Salicylic Acid, CABG= Coronary Artery Bypass Graft Surgery, DAPT= Dual Antiplatelet Therapy, MI= Myocardial Infarction, OAC= Oral Anticoagulants, PCI= Percutaneous Coronary Intervention, SCAD= Spontaneous Coronary Artery Dissection.  
<sup>1</sup>Anti-hypertensive treatment on admission. <sup>2</sup>Treatment with lipid lowering agents on admission. <sup>3</sup>Active or previous smoking history.

### Procedural characteristics

SCAD patients more often presented with STEMI when compared to non-SCAD MI patients, 47.6% and 39.3%, respectively (p<0.01). Coronary artery occlusion was found in 17.7% of

Version: 2021-11-14

SCAD patients and 23.8% of non-SCAD MI patients,  $p=0.08$ . (Table 2) Coronary artery atherosclerosis was reported in 17 (11.6%) SCAD patients.

Type 1 dissection was found in 12.2%, type 2A/2B dissection in 72.8%, type 3 dissection in 4.1% and type 4 in 10.9% of SCAD patients (Figure 1). Intracoronary imaging, OCT/IVUS, was used in 24.5% of SCAD patients and in 3.9% of non-SCAD MI patients.

PCI was attempted in 40.1% of SCAD patients and 30.6% received stent. In non-SCAD MI patients corresponding figures were 70.9% and 65.8%, respectively.

In SCAD patients with 100% coronary artery occlusion underwent PCI of which 65.5% were treated with stent implantation. Patients with non-occlusive SCAD were treated with stent implantation in 23% of cases. Intracoronary imaging was used in 24.5 % of SCAD-procedures compared with 3.3% in non-SCAD MI. The general success of PCI was 86.4% in the SCAD group compared to 94.8% in the non-SCAD MI population,  $p<0.01$ . (Table 2)

Table 2. Coronary angiography, invasive and medical management in SCAD and non-SCAD myocardial infarction (MI)

|                                                      | SCAD<br>n=147<br>n (%) | Non-SCAD MI<br>n=32601<br>n (%) | p-value |
|------------------------------------------------------|------------------------|---------------------------------|---------|
| <b>Coronary angiography, findings and procedures</b> |                        |                                 |         |
| STEMI                                                | 70 (47.6)              | 12823 (39.3)                    | <0.01   |
| Coronary artery occlusion                            | 26 (17.7)              | 7601 (23.8)                     | 0.08    |
| Conservative management                              | 88 (59.9)              | 9493 (29.1)                     | <0.01   |
| Attempted PCI                                        | 59 (40.1)              | 23108 (70.9)                    | <0.01   |
| PCI with stent                                       | 45 (30.6)              | 21455 (65.8)                    | <0.01   |
| OCT/IVUS                                             | 36 (24.5)              | 1260 (3.9)                      | <0.01   |
| General success*                                     | 51 (86.4)              | 21913 (94.8)                    | <0.01   |
| <b>Medical therapy at discharge</b>                  |                        |                                 |         |
| ACE-I or ARBs                                        | 87 (59.2)              | 24187 (74.2)                    | <0.01   |
| Beta-blockers                                        | 118 (81.9)             | 25370 (86.0)                    | 0.16    |
| ASA                                                  | 134 (93.1)             | 26522 (89.9)                    | 0.21    |
| ASA only                                             | 17 (11.6)              | 3096 (9.5)                      | 0.39    |
| P2Y <sub>12</sub> -inhibitor                         | 123 (85.4)             | 24871 (84.3)                    | 0.72    |
| DAPT                                                 | 117 (81.3)             | 23418 (79.4)                    | 0.59    |
| OAC                                                  | 13 (8.8)               | 3935 (12.2)                     | 0.22    |
| Statins                                              | 110 (76.4)             | 27036 (91.7)                    | <0.01   |

Version: 2021-11-14

ACE-I= Angiotensin Converting Enzyme Inhibitor, ASA= Acetylsalicylic Acid, ARB= Angiotensin Receptor Blocker, DAPT= Dual Antiplatelet Therapy, MI= Myocardial Infarction, OAC= Oral Anticoagulant, OCT/IVUS= Optical Coherence Tomography/Intravascular Ultrasound, PCI= Percutaneous Coronary Intervention, SCAD= Spontaneous Coronary Artery Dissection, STEMI= ST-segment Elevation Myocardial Infarction, \*Subjective assessment by the operator. The operator has reached the main aim of the treatment.

Management stratified by type of dissection is presented in Supplementary Table 2.

### Inpatient care time and medical treatment at discharge

There was no difference in days of hospitalisation during index event between the two groups, with a median of 4 days,  $p=0.93$ .

The use of betablockers, ASA, P2Y<sub>12</sub>-inhibitors, DAPT and oral anticoagulants (OACs) was similar between the groups at discharge. SCAD patients received DAPT in 81.3% while 11.6% received ASA only and 2.7% received no antiplatelet therapy. Non-SCAD MI patients received more often ACE-I/ARBs and statins at discharge, yet statins were prescribed in 76.4% of SCAD cases. (Table 2, Figure 2)

### Outcomes

There was no difference in rate of combined outcomes between the SCAD and the non-SCAD MI groups (10.9 and 13.4%,  $p=0.75$ ). (Table 3, Figure 3)

Table 3. Outcome in SCAD and non-SCAD myocardial infarction

|                                               | SCAD MI<br>n=147<br>n (%) | Non-SCAD MI<br>n=32601<br>n (%) | p-value |
|-----------------------------------------------|---------------------------|---------------------------------|---------|
| Death                                         | 4 (2.7)                   | 3099 (9.7)                      | <0.01   |
| MI                                            | 3 (2.0)                   | 1424 (4.4)                      | 0.20    |
| Acute coronary re-angiography after discharge | 14 (9.5)                  | 1495 (4.6)                      | <0.01   |

MI= Myocardial Infarction, SCAD= Spontaneous Coronary Artery Dissection,

Version: 2021-11-14

1  
2  
3  
4  
5  
6  
7  
8  
9  
10  
11  
12  
13  
14  
15  
16  
17  
18  
19  
20  
21  
22  
23  
24  
25  
26  
27  
28  
29  
30  
31  
32  
33  
34  
35  
36  
37  
38  
39  
40  
41  
42  
43  
44  
45  
46  
47  
48  
49  
50  
51  
52  
53  
54  
55  
56  
57  
58  
59  
60

Median number of days to outcomes was 10 for SCAD and 25 for non-SCAD MI. The rate of all-cause mortality in SCAD (2.7%) was lower when compared to the non-SCAD MI population (9.7%) ( $p<0.01$ ). There was no difference in the rate of re-infarction between the SCAD (2.0%) and the non-SCAD MI population (4.4%) ( $p=0.20$ ). Median number of days until re-infarction in SCAD patients was 37 days. The SCAD population was more often subject to acute re-angiography after the index event (9.5%) than the non-SCAD MI population (4.6%) ( $p<0.01$ ). (Table 3) Urgent PCI was attempted in 5 SCAD patients. (Supplementary Tables 3 and 4).

## Discussion

In this study with 100% nationwide coverage of MI patients undergoing coronary angiography during a two year period we found an incidence of SCAD at 0.74 cases per 100.000 inhabitants per year and a SCAD prevalence of 0.43% of all MI cases in Sweden at the time. The prevalence of SCAD in the MI population <50 years was 2.2% and 7.3% of MI cases in women <50 years. We found an equally high rate of combined outcomes and recurrent MI in the two MI groups whereas SCAD patients were more often subject to acute coronary re-angiography. Although 59.9% were treated conservatively without PCI or CABG, 81.3% of SCAD patients were discharged with DAPT.

## Epidemiology

While the prevalence of SCAD was lower than most other studies have suggested, we found a higher prevalence of SCAD than previously published multicenter studies. (20-22) An older study of 32 869 patients from 3 centers in western Denmark identified a SCAD prevalence of



Version: 2021-11-14

0.2% during 8 years whereas a Japanese study of 20 195 MI patients collected in 20 centers during 13 years identified a SCAD prevalence of 0.31% (20-22) The higher prevalence in our cohort may be explained by the increasing knowledge of SCAD and possible genetic differences between the Swedish and Japanese populations. In addition, we did not exclude patients with angiographic signs of atherosclerosis in other than SCAD vessels. On the other hand, when comparing with smaller single center studies, the prevalence in our cohort is lower. This might be attributed to the relatively new SCAD variable in SCAAR with an increasing learning curve among interventionists to recognise and report all types of SCAD in the SCAAR registry. Thus, a certain underdiagnosis may have caused a lower degree of identification of SCAD cases than in centers with special interest in SCAD.

We also found a lower prevalence of SCAD in female MI patients <50 years (7.3%) compared to previous studies. Four studies have reported a SCAD prevalence of 23-36% in women below 50-60 years with MI. Three of these are small single center studies including  $\leq 20$  SCAD cases less than 60 years. (1, 20, 21) The fourth by Nakashima et. al. reported a SCAD prevalence of 35% in women <50 years with MI. (11) This is in contrast to our findings and we speculate it to be related to genetic variations and a low prevalence of CAD in Japan.

### Risk factors

Our results are in line with previous studies showing that SCAD predominantly affects middle-aged women with a low prevalence of cardiovascular risk factors and ongoing cardiovascular medications.(1, 2, 4, 9, 11, 12, 14, 18, 20) Interestingly, 10% of SCAD cases included in our study had suffered a previous MI. This may be explained by SCAD recurrency as we do not know if the indexed SCAD occasion was the first. Rate of recurrency has been described to be between 4.7-17% in 2-4 years which aligns with our findings. (11,



Version: 2021-11-14

1  
2  
3 12, 14) Other possible explanations are inclusion of patients with concurrent atherosclerosis in  
4  
5 other coronary segments than the one affected by SCAD.  
6  
7

## 8 9 Sex

10  
11  
12 Our SCAD population included 25% men which is in contrast to previous studies - in  
13  
14 particular to those where SCAD patients with atherosclerosis have been excluded.(1, 9, 11)  
15  
16 However, there are studies with a proportion of male patients between 23% and 46.2%.(21,  
17  
18 22) A consequence of excluding all SCAD patients with any atherosclerosis is the selection of  
19  
20 younger and female patients, with a low burden of concomitant co-morbidity. When  
21  
22 describing findings from imaging, genetic or proteomic studies there could be a rationale to  
23  
24 select patients with a clear-cut SCAD diagnosis. On the other hand, when describing  
25  
26 incidence, prevalence, management and prognosis, it is of great importance not to introduce a  
27  
28 selection bias by excluding patients with concomitant atherosclerotic manifestations. The  
29  
30 current study included all patients with SCAD unless iatrogenic or due to plaque rupture and  
31  
32 hence describes the entire SCAD population without selection. Our results indicate that also  
33  
34 men are, to a larger extent than previously thought, affected by SCAD, and that the diagnosis  
35  
36 should not be overlooked but sought after in these patients too.  
37  
38  
39  
40  
41  
42

## 43 Angiography and intervention

44  
45  
46 Type 2 dissection was the most common angiographic manifestation, in accordance with  
47  
48 previous studies, followed by type 1, however only seen in 12.2% as opposed to 29-55% in  
49  
50 previous reports. Meanwhile, the prevalence of type 3 was similar between this and other  
51  
52 studies.(1, 4, 9, 11) This indicates that intimal flap appearance and dual lumen sign is less  
53  
54 prevalent than previously suggested, probably due to increasing recognition of non-classical  
55  
56 appearance of SCAD. Although intravascular imaging was more widely used in SCAD  
57  
58 patients, a majority of type 3 and 4 SCAD cases were diagnosed without using OCT/IVUS.  
59  
60

Version: 2021-11-14

1  
2  
3 As type 3 is defined as angiographically indistinguishable from atherosclerotic coronary  
4 artery disease, diagnosing type 3 without intravascular imaging is a limitation in this study.  
5  
6  
7

8 There are several feasible reasons for this, including technical difficulties in the case of distal  
9 occlusions or ignorance of its necessity. In addition, the diagnosis of SCAD mimicking CAD  
10 does not always require intravascular imaging but can be made with enough experience  
11 without arduous catheterisation.  
12  
13  
14  
15  
16

17  
18 SCAD patients underwent PCI and stenting less frequently at the index event than non-SCAD  
19 MI patients, although PCI was attempted in 40% of cases and 30% received stents. Other  
20 retrospective studies of SCAD patients have reported revascularisation rates between 12-  
21 56%.(4, 5, 9, 11, 23) As there are no RCTs describing optimal management, we cannot  
22 comment on over- or undertreatment. Nor do we have information regarding the clinical  
23 circumstances underlying choice of treatment e.g., PCI on vital indication in  
24 hemodynamically unstable patients.  
25  
26  
27  
28  
29  
30  
31  
32  
33  
34

### 35 Medication

36  
37  
38  
39  
40 We found the medication at discharge to be remarkably similar in patients with SCAD and  
41 non-SCAD MI, including the use of ASA, P2Y<sub>12</sub>-inhibitors and DAPT. This might reflect  
42 adherence to current guidelines for ACS in the absence of SCAD specific evidence. (6, 7) In  
43 the current study 80% of SCAD patients were treated with betablockers, which has been  
44 proposed to be beneficial.(15) In a retrospective study of 327 patients the use of betablockers  
45 was associated with a lower risk of recurrent SCAD and this therapy could therefore be  
46 considered. (6, 7) The prescription rate of statins was high in SCAD patients, despite not  
47 being recommended. (6, 7)  
48  
49  
50  
51  
52  
53  
54  
55  
56  
57  
58  
59  
60

Version: 2021-11-14

## Outcomes

The overall rate of outcomes did not differ between SCAD and non-SCAD MI. However, all-cause mortality was lower in SCAD, yet the rate of recurrent MI was equal. Furthermore, SCAD patients were more often subject to acute coronary re-angiography after the index event, 9.5%. This is evidence of significant morbidity in SCAD, especially as age and cardiovascular risk factors have not been adjusted for, due to the relatively small study population with SCAD. In 3 recently published European SCAD-studies (16-18) the unplanned re-angiography was 4%, 8.5% and 5.3% respectively. The present study found a death rate of 2.7% after a median follow-up of 17.3 months indicating a higher mortality than in previous studies. This could be caused by inclusion of a more representative and unselected population of SCAD patients.

Although recurrent MI was equal between the two groups, our 2% recurrency rate is lower than previously described, varying between 4.8-12% per year.(11, 15) SCAD recurrency has been reported at 4.7-17% in 22-47 months. (11, 12, 14) The discrepancy between our study and the American and Canadian series is however small and may be due to different lengths of follow-up as adverse events may not be evenly distributed in time. (12, 15)

The cause of the high rate of acute, unplanned coronary re-angiography after the index event is not known to us and is not explained by recurrent MI or need for revascularisation as PCI was attempted in only 5/14 acute coronary re-angiographies. Further studies are needed to elucidate this, although it is plausible that a high prevalence of recurrent angina and difficulties in chest pain risk assessment could be contributing factors.

## Conclusion

Version: 2021-11-14

1  
2  
3 SCAD patients were comparatively young and previously healthy, yet suffered substantial  
4 mortality and morbidity and are frequently subject to acute coronary re-angiography and its  
5 accompanying risks. As both incidence and prevalence are low, data highlight the careful  
6 need of diagnostic awareness in both men and women and in patients with co-existing  
7 atherosclerotic coronary artery disease.  
8  
9  
10  
11  
12  
13  
14

## 15 Author statement

16  
17 H Wilander, S Sederholm Lawesson, D Venetsanos and E Swahn are responsible for the conception  
18 and design of the study, have full access to all data, analysed and interpreted the data and drafted  
19 the manuscript. C Pagonis gathered the PCI data, critically revised the manuscript and added  
20 important intellectual content. C Dworeck, L Jonasson, N Johnston, T Kellerth, P Tornvall and T  
21 Yndigeegn critically revised the manuscript and added important intellectual content.  
22  
23  
24  
25  
26  
27  
28  
29  
30

## 31 Funding

32  
33 This work was supported by Östergötland County Council (LIO-701071, E.S.) and the Swedish  
34 Heart and Lung foundation (nr. 20190379, E.S).  
35  
36  
37

## 38 Acknowledgements

39  
40 The authors gratefully acknowledge all the participating PCI centers in Sweden.  
41  
42  
43

## 44 Impact on daily practice

45  
46 As the knowledge is very scarce regarding SCAD-patients, a nationwide study on all-comers like  
47 this, has the potential to be used as a basis for changed routines regarding the handling of SCAD  
48 patients and also for new prospective randomised clinical trials challenging the current handling  
49 and treatment of these patients.  
50  
51  
52  
53  
54  
55

## 56 Disclosure

57  
58 The Authors declare that there are no conflicts of interest.  
59  
60

Version: 2021-11-14

## Data availability statement

The data underlying this article will be shared on reasonable request to the corresponding author.

For peer review only

Version: 2021-11-14

## References

1. Rashid HN, Wong DT, Wijesekera H, Gutman SJ, Shanmugam VB, Gulati R, et al. Incidence and characterisation of spontaneous coronary artery dissection as a cause of acute coronary syndrome--A single-centre Australian experience. *International journal of cardiology*. 2016;202:336-8.
2. Saw J, Ricci D, Starovoytov A, Fox R, Buller CE. Spontaneous coronary artery dissection: prevalence of predisposing conditions including fibromuscular dysplasia in a tertiary center cohort. *JACC Cardiovasc Interv*. 2013;6(1):44-52.
3. Maehara A, Mintz GS, Castagna MT, Pichard AD, Satler LF, Waksman R, et al. Intravascular ultrasound assessment of spontaneous coronary artery dissection. *The American journal of cardiology*. 2002;89(4):466-8.
4. Rogowski S, Maeder MT, Weilenmann D, Haager PK, Ammann P, Rohner F, et al. Spontaneous Coronary Artery Dissection: Angiographic Follow-Up and Long-Term Clinical Outcome in a Predominantly Medically Treated Population. *Catheterization and cardiovascular interventions : official journal of the Society for Cardiac Angiography & Interventions*. 2017;89(1):59-68.
5. Tweet MS, Eleid MF, Best PJ, Lennon RJ, Lerman A, Rihal CS, et al. Spontaneous coronary artery dissection: revascularization versus conservative therapy. *Circulation Cardiovascular interventions*. 2014;7(6):777-86.
6. Adlam D, Alfonso F, Maas A, Vrints C, Writing C. European Society of Cardiology, acute cardiovascular care association, SCAD study group: a position paper on spontaneous coronary artery dissection. *Eur Heart J*. 2018;39(36):3353-68.
7. Hayes SN, Kim ESH, Saw J, Adlam D, Arslanian-Engoren C, Economy KE, et al. Spontaneous Coronary Artery Dissection: Current State of the Science: A Scientific Statement From the American Heart Association. *Circulation*. 2018;137(19):e523-e57.
8. Persu A, Giavarini A, Touze E, Januszewicz A, Sapoval M, Azizi M, et al. European consensus on the diagnosis and management of fibromuscular dysplasia. *J Hypertens*. 2014;32(7):1367-78.
9. Saw J, Aymong E, Sedlak T, Buller CE, Starovoytov A, Ricci D, et al. Spontaneous coronary artery dissection: association with predisposing arteriopathies and precipitating stressors and cardiovascular outcomes. *Circulation Cardiovascular interventions*. 2014;7(5):645-55.
10. Prakash R, Starovoytov A, Heydari M, Mancini GB, Saw J. Catheter-Induced Iatrogenic Coronary Artery Dissection in Patients With Spontaneous Coronary Artery Dissection. *JACC Cardiovascular interventions*. 2016;9(17):1851-3.
11. Nakashima T, Noguchi T, Haruta S, Yamamoto Y, Oshima S, Nakao K, et al. Prognostic impact of spontaneous coronary artery dissection in young female patients with acute myocardial infarction: A report from the Angina Pectoris-Myocardial Infarction Multicenter Investigators in Japan. *International journal of cardiology*. 2016;207:341-8.
12. Tweet MS, Hayes SN, Pitta SR, Simari RD, Lerman A, Lennon RJ, et al. Clinical features, management, and prognosis of spontaneous coronary artery dissection. *Circulation*. 2012;126(5):579-88.
13. Main A, Prakash R, Starovoytov A, Sabbaghan A, Aymong E, Mancini GB, et al. Characteristics of extension and de novo recurrent spontaneous coronary artery dissection. *EuroIntervention : journal of EuroPCR in collaboration with the Working Group on Interventional Cardiology of the European Society of Cardiology*. 2017;13(12):e1454-e9.
14. Lettieri C, Zavalloni D, Rossini R, Morici N, Etti F, Leonzi O, et al. Management and Long-Term Prognosis of Spontaneous Coronary Artery Dissection. *The American journal of cardiology*. 2015;116(1):66-73.
15. Saw J, Humphries K, Aymong E, Sedlak T, Prakash R, Starovoytov A, et al. Spontaneous Coronary Artery Dissection: Clinical Outcomes and Risk of Recurrence. *Journal of the American College of Cardiology*. 2017;70(9):1148-58.

Version: 2021-11-14

16. Mori R, Macaya F, Giacobbe F, Salinas P, Pavani M, Boi A, et al. Clinical outcomes by angiographic type of spontaneous coronary artery dissection. *EuroIntervention*. 2021;17(6):516-24.
17. Combaret N, Gerbaud E, Derimay F, Souteyrand G, Cassagnes L, Bouajila S, et al. National French registry of spontaneous coronary artery dissections: prevalence of fibromuscular dysplasia and genetic analyses. *EuroIntervention*. 2021;17(6):508-15.
18. Garcia-Guimaraes M, Bastante T, Macaya F, Roura G, Sanz R, Barahona Alvarado JC, et al. Spontaneous coronary artery dissection in Spain: clinical and angiographic characteristics, management, and in-hospital events. *Rev Esp Cardiol (Engl Ed)*. 2021;74(1):15-23.
19. Jernberg T, Attebring MF, Hambraeus K, Ivert T, James S, Jeppsson A, et al. The Swedish Web-system for enhancement and development of evidence-based care in heart disease evaluated according to recommended therapies (SWEDEHEART). *Heart*. 2010;96(20):1617-21.
20. Vanzetto G, Berger-Coz E, Barone-Rochette G, Chavanon O, Bouvaist H, Hacini R, et al. Prevalence, therapeutic management and medium-term prognosis of spontaneous coronary artery dissection: results from a database of 11,605 patients. *Eur J Cardiothorac Surg*. 2009;35(2):250-4.
21. Mortensen KH, Thuesen L, Kristensen IB, Christiansen EH. Spontaneous coronary artery dissection: a Western Denmark Heart Registry study. *Catheterization and cardiovascular interventions : official journal of the Society for Cardiac Angiography & Interventions*. 2009;74(5):710-7.
22. Nishiguchi T, Tanaka A, Ozaki Y, Taruya A, Fukuda S, Taguchi H, et al. Prevalence of spontaneous coronary artery dissection in patients with acute coronary syndrome. *Eur Heart J Acute Cardiovasc Care*. 2016;5(3):263-70.
23. Alfonso F, Paulo M, Lennie V, Dutary J, Bernardo E, Jimenez-Quevedo P, et al. Spontaneous coronary artery dissection: long-term follow-up of a large series of patients prospectively managed with a "conservative" therapeutic strategy. *JACC Cardiovasc Interv*. 2012;5(10):1062-70.

Version: 2021-11-14

1  
2  
3 **Figure legends**  
4

5 **Figure 1. Distribution of SCAD subtypes.**

6  
7 **Figure 2. Medical therapy at discharge.**

8  
9 **Figure 3. Outcomes in SCAD and non-SCAD MI.**  
10  
11  
12  
13  
14  
15  
16  
17  
18  
19  
20  
21  
22  
23  
24  
25  
26  
27  
28  
29  
30  
31  
32  
33  
34  
35  
36  
37  
38  
39  
40  
41  
42  
43  
44  
45  
46  
47  
48  
49  
50  
51  
52  
53  
54  
55  
56  
57  
58  
59  
60

For peer review only



1  
2  
3  
4  
5  
6  
7  
8  
9  
10  
11  
12  
13  
14  
15  
16  
17  
18  
19  
20  
21  
22  
23  
24  
25  
26  
27  
28  
29  
30  
31  
32  
33  
34  
35  
36  
37  
38  
39  
40  
41  
42  
43  
44  
45  
46  
47  
48  
49  
50  
51  
52  
53  
54  
55  
56  
57  
58  
59  
60

Figure 1.

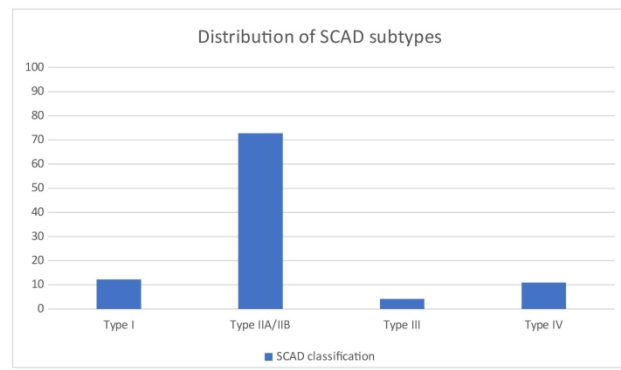

Figure 1

209x297mm (300 x 300 DPI)

1  
2  
3  
4  
5  
6  
7  
8  
9  
10  
11  
12  
13  
14  
15  
16  
17  
18  
19  
20  
21  
22  
23  
24  
25  
26  
27  
28  
29  
30  
31  
32  
33  
34  
35  
36  
37  
38  
39  
40  
41  
42  
43  
44  
45  
46  
47  
48  
49  
50  
51  
52  
53  
54  
55  
56  
57  
58  
59  
60

Figure 2.

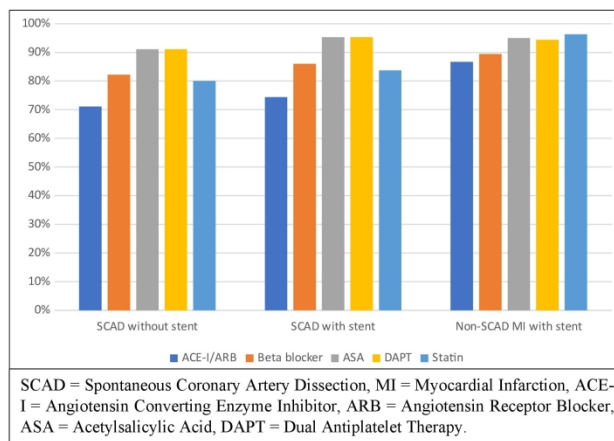

Figure 2

209x297mm (300 x 300 DPI)

1  
2  
3  
4  
5  
6  
7  
8  
9  
10  
11  
12  
13  
14  
15  
16  
17  
18  
19  
20  
21  
22  
23  
24  
25  
26  
27  
28  
29  
30  
31  
32  
33  
34  
35  
36  
37  
38  
39  
40  
41  
42  
43  
44  
45  
46  
47  
48  
49  
50  
51  
52  
53  
54  
55  
56  
57  
58  
59  
60

Figure 3.

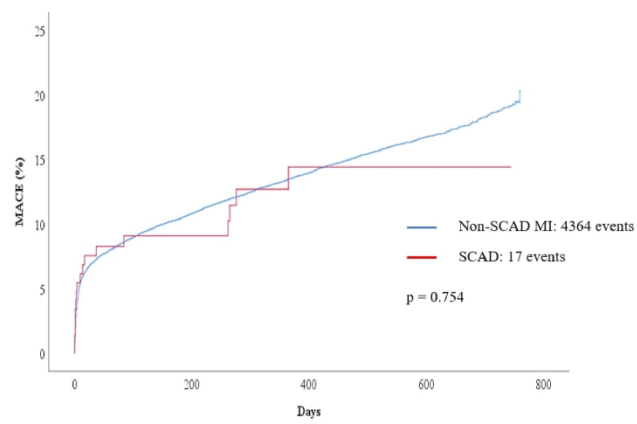

| Number at risk |       |       |       |      |
|----------------|-------|-------|-------|------|
| ■              | 32601 | 21444 | 13178 | 5926 |
| ■              | 147   | 88    | 47    | 19   |

MACE = Major Adverse Cardiac Events, SCAD = Spontaneous Coronary Artery Dissection, MI = Myocardial Infarction.

Figure 3

209x297mm (300 x 300 DPI)

## SweSCAD: Supplementary tables and figures

Supplementary Table 1. Saw angiographic classification of SCAD

|                 | Classification                                                                                                                                                                                                                                            |
|-----------------|-----------------------------------------------------------------------------------------------------------------------------------------------------------------------------------------------------------------------------------------------------------|
| SCAD type 1     | The classical angiographic radiolucent ‘flap’ and linear double lumen.                                                                                                                                                                                    |
| SCAD type 2a/2b | A long diffuse and smooth stenosis predominantly located in mid-to-distal segments, and classical signs of a dissection as in Type 1 are missing; Type 2a: Distal vessel normal; Type 2b: The stenosis extends angiographically to the end of the vessel. |
| SCAD type 3     | Angiographically indistinguishable from a focal atherosclerotic stenosis requiring diagnostic confirmation by OCT or IVUS.                                                                                                                                |
| SCAD type 4     | Total occlusion. The diagnosis established once coronary flow is re-established or inferred by subsequent vessel healing and the exclusion of an embolic cause.                                                                                           |

Supplementary Table 2. Coronary angiography and invasive management in SCAD subtypes

|                                                                                                                                                                                                                                                                                                                                                     | Saw Classification<br>(index event) | I<br>n=18 (%) | IIA/IIB<br>n=107 (%) | III<br>n=6 (%) | IV<br>n=16 (%) |
|-----------------------------------------------------------------------------------------------------------------------------------------------------------------------------------------------------------------------------------------------------------------------------------------------------------------------------------------------------|-------------------------------------|---------------|----------------------|----------------|----------------|
| Diagnostic<br>features                                                                                                                                                                                                                                                                                                                              | STEMI                               | 7 (38.9)      | 47 (43.9)            | 5 (83.3)       | 11 (68.8)      |
|                                                                                                                                                                                                                                                                                                                                                     | OCT/IVUS used                       | 4 (22.2)      | 26 (24.3)            | 2 (33.3)       | 4 (25.0)       |
| Invasive<br>management                                                                                                                                                                                                                                                                                                                              | Conservative management             | 13 (72.2)     | 67 (62.6)            | 5 (83.3)       | 3 (18.8)       |
|                                                                                                                                                                                                                                                                                                                                                     | Attempted PCI                       | 5 (27.8)      | 40 (37.4)            | 1 (16.7)       | 13 (81.3)      |
|                                                                                                                                                                                                                                                                                                                                                     | PCI with stent                      | 5 (27.8)      | 31 (29.0)            | 1 (16.7)       | 8 (50.0)       |
|                                                                                                                                                                                                                                                                                                                                                     | General success*                    | 4 (80)        | 35 (87.5)            | 1 (100%)       | 11 (84.6)      |
| MI= Myocardial Infarction, OCT/IVUS= Optical Coherence Tomography / IntraVascular<br>UltraSound, PCI= Percutaneous Coronary Intervention, SCAD= Spontaneous Coronary<br>Artery Dissection, STEMI= ST-segment Elevation Myocardial Infarction.<br>*Subjective assessment by the operator. The operator has reached the main aim of the<br>treatment. |                                     |               |                      |                |                |

Supplementary Table 3. Outcome in SCAD subtypes

|                               | I<br>n=18 (%) | IIA/IIB<br>n=107 (%) | III<br>n=6 (%) | IV<br>n=16 (%) |
|-------------------------------|---------------|----------------------|----------------|----------------|
| Death                         | 2 (11.1)      | 0 (0)                | 0 (0)          | 2 (12.5)       |
| MI                            | 0 (0)         | 3 (2.8)              | 0 (0)          | 0 (0)          |
| Acute coronary re-angiography | 1 (5.5)       | 10 (9.3)             | 1 (16.7)       | 2 (12.5)       |

MI = Myocardial Infarction, SCAD = Spontaneous Coronary Artery Dissection,

For peer review only

STROBE Statement—Checklist of items that should be included in reports of *cohort studies*

|                              | Item No | Recommendation                                                                                                                                                                                    | Page No |
|------------------------------|---------|---------------------------------------------------------------------------------------------------------------------------------------------------------------------------------------------------|---------|
| <b>Title and abstract</b>    | 1       | (a) Indicate the study's design with a commonly used term in the title or the abstract                                                                                                            | 1       |
|                              |         | (b) Provide in the abstract an informative and balanced summary of what was done and what was found                                                                                               | 2       |
| <b>Introduction</b>          |         |                                                                                                                                                                                                   |         |
| Background/rationale         | 2       | Explain the scientific background and rationale for the investigation being reported                                                                                                              | 4-5     |
| Objectives                   | 3       | State specific objectives, including any prespecified hypotheses                                                                                                                                  | 5       |
| <b>Methods</b>               |         |                                                                                                                                                                                                   |         |
| Study design                 | 4       | Present key elements of study design early in the paper                                                                                                                                           | 5       |
| Setting                      | 5       | Describe the setting, locations, and relevant dates, including periods of recruitment, exposure, follow-up, and data collection                                                                   | 5       |
| Participants                 | 6       | (a) Give the eligibility criteria, and the sources and methods of selection of participants. Describe methods of follow-up                                                                        | 5-6     |
|                              |         | (b) For matched studies, give matching criteria and number of exposed and unexposed                                                                                                               | NA      |
| Variables                    | 7       | Clearly define all outcomes, exposures, predictors, potential confounders, and effect modifiers. Give diagnostic criteria, if applicable                                                          | 6-7     |
| Data sources/<br>measurement | 8*      | For each variable of interest, give sources of data and details of methods of assessment (measurement). Describe comparability of assessment methods if there is more than one group              | 5-6     |
| Bias                         | 9       | Describe any efforts to address potential sources of bias                                                                                                                                         | 14      |
| Study size                   | 10      | Explain how the study size was arrived at                                                                                                                                                         | NA      |
| Quantitative variables       | 11      | Explain how quantitative variables were handled in the analyses. If applicable, describe which groupings were chosen and why                                                                      | 7       |
| Statistical methods          | 12      | (a) Describe all statistical methods, including those used to control for confounding                                                                                                             | 7       |
|                              |         | (b) Describe any methods used to examine subgroups and interactions                                                                                                                               |         |
|                              |         | (c) Explain how missing data were addressed                                                                                                                                                       |         |
|                              |         | (d) If applicable, explain how loss to follow-up was addressed                                                                                                                                    |         |
|                              |         | (e) Describe any sensitivity analyses                                                                                                                                                             |         |
| <b>Results</b>               |         |                                                                                                                                                                                                   |         |
| Participants                 | 13*     | (a) Report numbers of individuals at each stage of study—eg numbers potentially eligible, examined for eligibility, confirmed eligible, included in the study, completing follow-up, and analysed | 7       |
|                              |         | (b) Give reasons for non-participation at each stage                                                                                                                                              |         |
|                              |         | (c) Consider use of a flow diagram                                                                                                                                                                |         |
| Descriptive data             | 14*     | (a) Give characteristics of study participants (eg demographic, clinical, social) and information on exposures and potential confounders                                                          | 7-8     |
|                              |         | (b) Indicate number of participants with missing data for each variable of interest                                                                                                               | 7       |
|                              |         | (c) Summarise follow-up time (eg, average and total amount)                                                                                                                                       | 9       |
| Outcome data                 | 15*     | Report numbers of outcome events or summary measures over time                                                                                                                                    | 9       |

|    |                          |    |                                                                                                                                                                                                              |       |
|----|--------------------------|----|--------------------------------------------------------------------------------------------------------------------------------------------------------------------------------------------------------------|-------|
| 1  | Main results             | 16 | (a) Give unadjusted estimates and, if applicable, confounder-adjusted estimates and their precision (eg, 95% confidence interval). Make clear which confounders were adjusted for and why they were included | 9     |
| 2  |                          |    | (b) Report category boundaries when continuous variables were categorized                                                                                                                                    | NA    |
| 3  |                          |    | (c) If relevant, consider translating estimates of relative risk into absolute risk for a meaningful time period                                                                                             | NA    |
| 4  |                          |    |                                                                                                                                                                                                              |       |
| 5  |                          |    |                                                                                                                                                                                                              |       |
| 6  |                          |    |                                                                                                                                                                                                              |       |
| 7  |                          |    |                                                                                                                                                                                                              |       |
| 8  |                          |    |                                                                                                                                                                                                              |       |
| 9  | Other analyses           | 17 | Report other analyses done—eg analyses of subgroups and interactions, and sensitivity analyses                                                                                                               | NA    |
| 10 |                          |    |                                                                                                                                                                                                              |       |
| 11 | <b>Discussion</b>        |    |                                                                                                                                                                                                              |       |
| 12 |                          |    |                                                                                                                                                                                                              |       |
| 13 | Key results              | 18 | Summarise key results with reference to study objectives                                                                                                                                                     | 10    |
| 14 | Limitations              | 19 | Discuss limitations of the study, taking into account sources of potential bias or imprecision. Discuss both direction and magnitude of any potential bias                                                   | 14    |
| 15 |                          |    |                                                                                                                                                                                                              |       |
| 16 | Interpretation           | 20 | Give a cautious overall interpretation of results considering objectives, limitations, multiplicity of analyses, results from similar studies, and other relevant evidence                                   | 10-14 |
| 17 |                          |    |                                                                                                                                                                                                              |       |
| 18 |                          |    |                                                                                                                                                                                                              |       |
| 19 | Generalisability         | 21 | Discuss the generalisability (external validity) of the study results                                                                                                                                        | 14    |
| 20 |                          |    |                                                                                                                                                                                                              |       |
| 21 | <b>Other information</b> |    |                                                                                                                                                                                                              |       |
| 22 | Funding                  | 22 | Give the source of funding and the role of the funders for the present study and, if applicable, for the original study on which the present article is based                                                | 15    |
| 23 |                          |    |                                                                                                                                                                                                              |       |
| 24 |                          |    |                                                                                                                                                                                                              |       |

\*Give information separately for exposed and unexposed groups.

**Note:** An Explanation and Elaboration article discusses each checklist item and gives methodological background and published examples of transparent reporting. The STROBE checklist is best used in conjunction with this article (freely available on the Web sites of PLoS Medicine at <http://www.plosmedicine.org/>, Annals of Internal Medicine at <http://www.annals.org/>, and Epidemiology at <http://www.epidem.com/>). Information on the STROBE Initiative is available at <http://www.strobe-statement.org>.



# BMJ Open

## A nationwide observational study of incidence, management and outcome of spontaneous coronary artery dissection - a report from the Swedish Coronary Angiography and Angioplasty register

|                                 |                                                                                                                                                                                                                                                                                                                                                                                                                                                                                                                                                                                                                                                                                                                                                                                                                                                                                                                                                                                                                                                                                                                                                                                                                                              |
|---------------------------------|----------------------------------------------------------------------------------------------------------------------------------------------------------------------------------------------------------------------------------------------------------------------------------------------------------------------------------------------------------------------------------------------------------------------------------------------------------------------------------------------------------------------------------------------------------------------------------------------------------------------------------------------------------------------------------------------------------------------------------------------------------------------------------------------------------------------------------------------------------------------------------------------------------------------------------------------------------------------------------------------------------------------------------------------------------------------------------------------------------------------------------------------------------------------------------------------------------------------------------------------|
| Journal:                        | <i>BMJ Open</i>                                                                                                                                                                                                                                                                                                                                                                                                                                                                                                                                                                                                                                                                                                                                                                                                                                                                                                                                                                                                                                                                                                                                                                                                                              |
| Manuscript ID                   | bmjopen-2022-060949.R1                                                                                                                                                                                                                                                                                                                                                                                                                                                                                                                                                                                                                                                                                                                                                                                                                                                                                                                                                                                                                                                                                                                                                                                                                       |
| Article Type:                   | Original research                                                                                                                                                                                                                                                                                                                                                                                                                                                                                                                                                                                                                                                                                                                                                                                                                                                                                                                                                                                                                                                                                                                                                                                                                            |
| Date Submitted by the Author:   | 07-Apr-2022                                                                                                                                                                                                                                                                                                                                                                                                                                                                                                                                                                                                                                                                                                                                                                                                                                                                                                                                                                                                                                                                                                                                                                                                                                  |
| Complete List of Authors:       | <p>Wilander, Henrik; Linköpings universitet, Department of Cardiology and Department of Health, Medicine and Caring Sciences<br/> Pagonis, Christos; Linköping University, Department of Cardiology and Department of Health, Medicine and Caring Sciences<br/> Venetsanos, Dimitrios; Karolinska Institute, Division of cardiology, Department of Medicine<br/> Swahn, Eva; Linköping University, Department of Cardiology and Department of Health, Medicine and Caring Sciences<br/> Dworeck, Christian; Institute of Medicine, SU Sahlgrenska, Department of Molecular and Clinical Medicine<br/> Johnston, Nina; Uppsala University, Department of Medical Sciences, Cardiology<br/> Jonasson, Lena; Linköping University Faculty of Medicine, Department of Cardiology and Department of Health, Medicine and Caring Sciences<br/> Kellerth, Thomas; Region Värmland, Department of acute cardiology<br/> Tornvall, Per; Karolinska Institute, Cardiology Unit, Department of Clinical Science and Education Södersjukhuset<br/> Yndigegn, Troels; Lund University, Department of cardiology<br/> Sederholm Lawesson, Sofia; Linköping University, Department of Cardiology and Department of Health, Medicine and Caring Sciences</p> |
| <b>Primary Subject Heading</b>: | Cardiovascular medicine                                                                                                                                                                                                                                                                                                                                                                                                                                                                                                                                                                                                                                                                                                                                                                                                                                                                                                                                                                                                                                                                                                                                                                                                                      |
| Secondary Subject Heading:      | Cardiovascular medicine                                                                                                                                                                                                                                                                                                                                                                                                                                                                                                                                                                                                                                                                                                                                                                                                                                                                                                                                                                                                                                                                                                                                                                                                                      |
| Keywords:                       | Myocardial infarction < CARDIOLOGY, Ischaemic heart disease < CARDIOLOGY, Coronary intervention < CARDIOLOGY                                                                                                                                                                                                                                                                                                                                                                                                                                                                                                                                                                                                                                                                                                                                                                                                                                                                                                                                                                                                                                                                                                                                 |
|                                 |                                                                                                                                                                                                                                                                                                                                                                                                                                                                                                                                                                                                                                                                                                                                                                                                                                                                                                                                                                                                                                                                                                                                                                                                                                              |

SCHOLARONE™  
Manuscripts



I, the Submitting Author has the right to grant and does grant on behalf of all authors of the Work (as defined in the below author licence), an exclusive licence and/or a non-exclusive licence for contributions from authors who are: i) UK Crown employees; ii) where BMJ has agreed a CC-BY licence shall apply, and/or iii) in accordance with the terms applicable for US Federal Government officers or employees acting as part of their official duties; on a worldwide, perpetual, irrevocable, royalty-free basis to BMJ Publishing Group Ltd ("BMJ") its licensees and where the relevant Journal is co-owned by BMJ to the co-owners of the Journal, to publish the Work in this journal and any other BMJ products and to exploit all rights, as set out in our [licence](#).

The Submitting Author accepts and understands that any supply made under these terms is made by BMJ to the Submitting Author unless you are acting as an employee on behalf of your employer or a postgraduate student of an affiliated institution which is paying any applicable article publishing charge ("APC") for Open Access articles. Where the Submitting Author wishes to make the Work available on an Open Access basis (and intends to pay the relevant APC), the terms of reuse of such Open Access shall be governed by a Creative Commons licence – details of these licences and which [Creative Commons](#) licence will apply to this Work are set out in our licence referred to above.

Other than as permitted in any relevant BMJ Author's Self Archiving Policies, I confirm this Work has not been accepted for publication elsewhere, is not being considered for publication elsewhere and does not duplicate material already published. I confirm all authors consent to publication of this Work and authorise the granting of this licence.

Version: 2021-11-14

# A nationwide observational study of incidence, management and outcome of spontaneous coronary artery dissection - a report from the Swedish Coronary Angiography and Angioplasty register

**Running head:** Spontaneous coronary artery dissection (SCAD) in Sweden

Wilander H,<sup>1</sup> Pagonis C,<sup>1</sup> Venetsanos D,<sup>2</sup> Swahn E,<sup>1</sup> Christian Dworeck,<sup>5</sup> Johnston N,<sup>3</sup> Jonasson L,<sup>1</sup> Kellerth T<sup>7</sup>, Tornvall P,<sup>4</sup> Yndigegn T<sup>6</sup>, Sederholm Lawesson S<sup>1</sup>

## Affiliations

1. Department of Cardiology and Department of Health, Medicine and Caring Sciences, Linköping University, Linköping, Sweden
2. Division of Cardiology, Department of Medicine, Karolinska Institutet Solna and Karolinska University Hospital, Stockholm, Sweden
3. Department of Medical Sciences, Cardiology, University Hospital Uppsala, Uppsala University, Sweden
4. Cardiology Unit, Department of Clinical Science and Education Södersjukhuset/ Karolinska Institutet Sjukhusbacken 10, Stockholm; Sweden
5. Department of Molecular and Clinical Medicine at Institute of Medicine, SU Sahlgrenska, Gothenburg, Sweden
6. Department of Cardiology, Lund University, Skane University Hospital, Lund, Sweden
7. Department of Heart and Lung-physiology, Faculty of Health, Orebro University and University Hospital, Orebro, Sweden

Corresponding author:

Eva Swahn, MD, PhD

Department of Cardiology and Department of Health, Medicine and Caring Sciences, Linköping University, Linköping, Sweden

E-mail: [eva.swahn@liu.se](mailto:eva.swahn@liu.se)

[Twitter handle: @swahn\\_eva](#)

Tel: +46101032170

Word count: 2991

Version: 2021-11-14

1  
2  
3  
4  
5  
6  
7  
8  
9  
10  
11  
12  
13  
14  
15  
16  
17  
18  
19  
20  
21  
22  
23  
24  
25  
26  
27  
28  
29  
30  
31  
32  
33  
34  
35  
36  
37  
38  
39  
40  
41  
42  
43  
44  
45  
46  
47  
48  
49  
50  
51  
52  
53  
54  
55  
56  
57  
58  
59  
60

For peer review only

Version: 2021-11-14

## Abstract

### Objectives

The aim of this study was to conduct a nationwide all comer description of incidence, contemporary management and outcome in Swedish spontaneous coronary artery dissection (SCAD) patients. The incidence of SCAD as well as the management and outcome of these patients is not well described.

### Design

A nationwide observational study.

### Participants and Setting

All patients with SCAD registered in the Swedish coronary angiography and angioplasty register (SCAAR) from 2015 to 2017 were included. The index angiographies of patients with registered SCAD were re-evaluated at each centre to confirm the diagnosis. Patients with non-SCAD MI (n=32 601) were used for comparison.

### Outcome measures

Outcomes included all-cause mortality, re-infarction or acute coronary re-angiography.

### Results

This study found 147 SCAD patients, rendering an incidence of 0.74 per 100.000 per year and a prevalence of 0.43% of all MIs. The average age was 52.9 years, 75.5% were women and 47.6% presented with ST-segment elevation MI. Median follow up time for MACE was 17.3 months. Percutaneous coronary intervention (PCI) was attempted in 40.1% of SCAD patients and 30.6% received stent. The use of anti-thrombotic agents was similar between the groups and there was no difference regarding outcomes, 10.9% vs 13.4%, p=0.75. Mortality was lower in SCAD patients, 2.7% vs 8.0%,

Version: 2021-11-14

1  
2  
3 p = 0.03, whereas SCAD patients more often underwent acute re-angiography, 9.5% vs 4.6%,  
4  
5 p<0.01.  
6  
7

## 8 **Conclusion**

9  
10 In this nationwide, all comer Swedish study, the overall incidence of SCAD was low,  
11  
12 including 25% men which is more and in contrast to previous studies. Compared with non-  
13  
14 SCAD MI, SCAD patients were younger, with lower cardiovascular risk burden, yet suffered  
15  
16 substantial mortality and morbidity and more frequently underwent acute coronary re-  
17  
18 angiography.  
19  
20  
21  
22

## 23 **Key words**

24  
25 Spontaneous coronary artery dissection (SCAD); ACS/NSTE-ACS; STEMI  
26  
27  
28

## 29 **Article Summary**

### 30 31 **Strengths and limitations of this study**

- 32  
33 • All patients in Sweden considered having SCAD during the study period, and all  
34  
35 centers performing invasive coronary angiography are represented.  
36  
37
- 38  
39 • All angiographies where SCAD was reported in the SCAAR registry were reviewed  
40  
41 and validated by an independent interventional cardiologist.  
42  
43
- 44  
45 • All data regarding demographics, management, treatment and in-hospital outcomes are  
46  
47 immediately registered on-line, thus limiting recall bias and missing values as these  
48  
49 variables are compulsory to register.  
50  
51
- 52  
53 • Limitations include possible heterogeneity in the confirmation of SCAD diagnosis as  
54  
55 the study did not include a core-lab.  
56  
57  
58  
59  
60

Version: 2021-11-14

## Introduction

Spontaneous coronary artery dissection (SCAD) has been reported as the underlying cause of myocardial infarction (MI) in 0.2-4% of all cases with an inherent risk of sudden cardiac death.(1, 2) The dissection occurs independently of atherosclerosis causing coronary flow obstruction and acute myocardial ischemia.(3) The majority of SCAD patients are women between 44-53 years.(4, 5) The presence of conventional cardiovascular risk factors is low.(2, 6) Instead, the etiology of SCAD is multifactorial and often includes a pre-existing arteriopathy.(2, 7, 8)

SCAD presenting as Saw type 1 is an angiographic diagnosis, but as SCAD type 3 mimics atherosclerotic coronary artery disease (CAD) and type 2 is difficult to diagnose on angiography, clinical awareness, a high level of suspicion and sometimes intravascular imaging such as intravascular ultrasound (IVUS) or optical coherence tomography (OCT) in these cases is needed.(6, 7) However, these procedures may lead to propagation of the dissection as guidewires can enter the false lumen.(9, 10)

Percutaneous coronary intervention (PCI) also poses a risk of extending the dissection and carries a risk of stent malapposition subsequent to resorption of the intramural hematoma.(1, 4, 5, 9, 11, 12) Additionally, observational data indicate spontaneous healing within days to months after conservative treatment of SCAD.(1, 4, 13) Hence, current recommendation emphasises conservative treatment of patients without ongoing large areas of ischemia or hemodynamic instability.

The absence of randomised controlled trials (RCT) leaves current guidelines based on expert opinion. While SCAD patients treated by PCI should receive standard dual anti-platelet therapy (DAPT) the support for anti-platelet therapy in conservatively managed SCAD is lacking. Long term mortality after SCAD has been reported to be low with survival rates

Version: 2021-11-14

1  
2  
3 between 92-100% after 3-6 years follow up.(4, 14) On the other hand SCAD recurrence has  
4  
5 been reported in 10-17% during 3-4 years of follow up.(12, 15)  
6  
7

8 Although better recognised recently,(16-18) SCAD still remains insufficiently studied as there  
9  
10 are no nationwide reports on SCAD MIs relative to type 1 MIs, registered in the same period.  
11  
12 Thus, the aim was to study a Swedish all-comer MI population undergoing coronary  
13  
14 angiography, describing incidence, prevalence, medical and invasive management and  
15  
16 cardiovascular outcomes of SCAD compared with non-SCAD MI.  
17  
18  
19

## 20 Method

### 21 Study population

22  
23 This was a retrospective analysis of prospectively collected data using the Swedish coronary  
24  
25 angiography and angioplasty registry (SCAAR) (19). Between 17<sup>th</sup> of December 2015 and  
26  
27 30<sup>th</sup> of December 2017 all consecutive patients with recorded SCAD, were identified using  
28  
29 the SCAD variable launched in SCAAR on 15<sup>th</sup> of December 2015. Patients with non-SCAD  
30  
31 MI who underwent coronary angiography during the same time period were used for  
32  
33 comparison.  
34  
35  
36  
37  
38  
39

### 40 SCAAR registry

41  
42 The registry has previously been described, and covers 100% of patients undergoing coronary  
43  
44 angiography and PCI in Sweden. Data on baseline characteristics, medical history, procedural  
45  
46 characteristics and in-hospital complications are prospectively collected. SCAAR is a part of  
47  
48 the Swedish Web-system for Enhancement and Development of Evidence based care in Heart  
49  
50 disease Evaluated According to Recommended Therapies (SWEDEHEART). (19)  
51  
52  
53

54 Ongoing medication on arrival and at discharge were obtained by merging SCAAR with the  
55  
56 Swedish register of information and knowledge about Swedish heart intensive care  
57  
58 admissions (RIKS-HIA), another part of SWEDEHEART.  
59  
60



Version: 2021-11-14

### Angiographic SCAD diagnosis

All index angiographies of patients with SCAD were re-evaluated by an independent interventional cardiologist at each center to confirm the diagnosis. Patients without confirmed SCAD were excluded. SCAD was defined according to the Saw angiographic classification of SCAD. (Supplementary Table 1) Coronary artery dissections evaluated as secondary to atherosclerotic plaque rupture or iatrogenic dissections were excluded.

### Definition of outcomes and complications

The primary outcomes of this study were all-cause mortality, myocardial re-infarction, and acute invasive coronary re-angiography. Recurrent MI was defined as readmission according to the International Classification of Diseases (ICD) codes I21 and I22. Acute re-angiography was defined as an unplanned new coronary angiography after the index event. Information about all-cause mortality and MI were obtained by merging SCAAR with the national population registry and RIKS-HIA, respectively. Data about re-angiography and PCI were derived from SCAAR. Follow up for death and MI was available until June 2018 and for coronary re-angiography until January 2018.

### Ethics

All patients were informed of their participation in the SCAAR registry, and their possibility to withdraw their consent at any time. Anyhow, according to Swedish regulations, written informed consent is not required for registration in national quality registries such as SCAAR. Permission for the study was obtained from the regional Ethical Review Board, Linköping, Sweden (Dnr 2018/122-31), and complied with the Declaration of Helsinki. Patient data were anonymised to protect integrity.

### Statistical analysis

Data are presented as numbers and percentages, mean  $\pm$  standard deviations, or median with interquartile range, as appropriate. Comparisons of continuous variables were performed with the Student T-test, when normal distribution was present, otherwise the Mann Whitney U test

Version: 2021-11-14

1  
2  
3 was used. Comparison of categorical variables between groups was performed using the Chi<sup>2</sup>  
4  
5 test. Rate of cardiovascular events over time is presented using Kaplan-Meier curves and  
6  
7 outcome comparisons were performed using the log-rank tests. Any p-value <0.05 is  
8  
9 considered to indicate statistical significance. The overall proportion of missing data was low,  
10  
11 <2.5% of patients regardless of variable, except for smoking status which was missing in  
12  
13 7.2% of patients with non-SCAD MI. IBM SPSS statistics version 25 was used.  
14  
15  
16  
17

## 18 Patient and Public Involvement

19  
20  
21 Patients or the public were not involved in the design, or conduct, or reporting, or  
22  
23 dissemination plans of our research.  
24  
25  
26  
27  
28  
29  
30

## 31 Results

### 32 Patient characteristics

33  
34 In total, 264 patients from 30 centers were identified in SCAAR with an initial SCAD  
35  
36 diagnosis alongside 32 601 patients with non-SCAD MI. After re-evaluating angiograms of  
37  
38 all patients with registered definite or suspected SCAD, the diagnosis of definite SCAD was  
39  
40 confirmed in 147 patients from 24 centers. According to Statistics Sweden, the average  
41  
42 population in Sweden in the years 2015-2017 was 9 985 629 individuals, rendering an  
43  
44 incidence of SCAD at 0.74 per 100.000 per year and a prevalence of 0.43% of all MI cases  
45  
46 undergoing coronary angiography in Sweden at the same time. The prevalence of SCAD was  
47  
48 2.2% in the MI population <50 years, (7.3% and 0.8% in women and men respectively).  
49  
50 With a mean age of 52.9 years, SCAD patients were younger than patients with non-SCAD  
51  
52 MI, 68.5 year (p<0.01). The SCAD group consisted of 75.5% women compared to 31.9% of  
53  
54 the non-SCAD MI group. The prevalence of cardiovascular risk factors, use of acetylsalicylic  
55  
56  
57  
58  
59  
60

Version: 2021-11-14

acid (ASA), statins and anti-hypertensive medications on admission was lower in the SCAD group. (Table 1)

Table 1. Baseline characteristics in SCAD and non-SCAD myocardial infarction (MI)

|                              | SCAD MI<br>n=147<br>n (%) | Non-SCAD MI<br>n=32601<br>n (%) | p-value |
|------------------------------|---------------------------|---------------------------------|---------|
| Age                          | 52.9 ±12.2                | 68.5 ±11.8                      | <0.01   |
| Female gender                | 111 (75.5)                | 10391 (31.9)                    | <0.01   |
| Diabetes                     | 3 (2.0)                   | 6921 (21.4)                     | <0.01   |
| Hypertension <sup>1</sup>    | 39 (26.5)                 | 19070 (59.4)                    | <0.01   |
| Hyperlipidemia <sup>2</sup>  | 20 (13.7)                 | 9125 (30.4)                     | <0.01   |
| Smoking history <sup>3</sup> | 56 (38.1)                 | 17599 (58.1)                    | <0.01   |
| Previous MI                  | 16 (10.9)                 | 6733 (21.1)                     | <0.01   |
| Previous CABG                | 0                         | 1996 (6.1)                      | <0.01   |
| Previous PCI                 | 6 (4.1)                   | 5482 (16.8)                     | <0.01   |
| ACE-I or ARBs                | 26 (17.7)                 | 11904 (36.5)                    | <0.01   |
| Beta-blockers                | 25 (17.1)                 | 10107 (33.7)                    | <0.01   |
| ASA                          | 27 (18.5)                 | 8577 (28.6)                     | <0.01   |
| P2Y <sub>12</sub> -inhibitor | 4 (2.7)                   | 1642 (5.5)                      | 0.15    |
| DAPT                         | 3 (2.1)                   | 951 (3.2)                       | 0.44    |
| OAC                          | 7 (4.8)                   | 2426 (7.6)                      | 0.21    |
| Statins                      | 20 (13.7)                 | 9125 (30.4)                     | <0.01   |

ACE-I = Angiotensin Converting Enzyme Inhibitor, ARB= Angiotensin Receptor Blocker, ASA = Acetyl Salicylic Acid, CABG= Coronary Artery Bypass Graft Surgery, DAPT= Dual Antiplatelet Therapy, MI= Myocardial Infarction, OAC= Oral Anticoagulants, PCI= Percutaneous Coronary Intervention, SCAD= Spontaneous Coronary Artery Dissection.  
<sup>1</sup>Anti-hypertensive treatment on admission. <sup>2</sup>Treatment with lipid lowering agents on admission. <sup>3</sup>Active or previous smoking history.

### Procedural characteristics

SCAD patients more often presented with STEMI when compared to non-SCAD MI patients, 47.6% and 39.3%, respectively (p<0.01). Coronary artery occlusion was found in 17.7% of

Version: 2021-11-14

SCAD patients and 23.8% of non-SCAD MI patients,  $p=0.08$ . (Table 2) Coronary artery atherosclerosis was reported in 17 (11.6%) SCAD patients.

Type 1 dissection was found in 12.2%, type 2A/2B dissection in 72.8%, type 3 dissection in 4.1% and type 4 in 10.9% of SCAD patients (Figure 1). Intracoronary imaging, OCT/IVUS, was used in 24.5% of SCAD patients and in 3.9% of non-SCAD MI patients.

PCI was attempted in 40.1% of SCAD patients and 30.6% received stent. In non-SCAD MI patients corresponding figures were 70.9% and 65.8%, respectively.

In SCAD patients with 100% coronary artery occlusion underwent PCI of which 65.5% were treated with stent implantation. Patients with non-occlusive SCAD were treated with stent implantation in 23% of cases. Intracoronary imaging was used in 24.5 % of SCAD-procedures compared with 3.3% in non-SCAD MI. The general success of PCI was 86.4% in the SCAD group compared to 94.8% in the non-SCAD MI population,  $p<0.01$ . (Table 2)

Table 2. Coronary angiography, invasive and medical management in SCAD and non-SCAD myocardial infarction (MI)

|                                                      | SCAD<br>n=147<br>n (%) | Non-SCAD MI<br>n=32601<br>n (%) | p-value |
|------------------------------------------------------|------------------------|---------------------------------|---------|
| <b>Coronary angiography, findings and procedures</b> |                        |                                 |         |
| STEMI                                                | 70 (47.6)              | 12823 (39.3)                    | <0.01   |
| Coronary artery occlusion                            | 26 (17.7)              | 7601 (23.8)                     | 0.08    |
| Conservative management                              | 88 (59.9)              | 9493 (29.1)                     | <0.01   |
| Attempted PCI                                        | 59 (40.1)              | 23108 (70.9)                    | <0.01   |
| PCI with stent                                       | 45 (30.6)              | 21455 (65.8)                    | <0.01   |
| OCT/IVUS                                             | 36 (24.5)              | 1260 (3.9)                      | <0.01   |
| General success*                                     | 51 (86.4)              | 21913 (94.8)                    | <0.01   |
| <b>Medical therapy at discharge</b>                  |                        |                                 |         |
| ACE-I or ARBs                                        | 87 (59.2)              | 24187 (74.2)                    | <0.01   |
| Beta-blockers                                        | 118 (81.9)             | 25370 (86.0)                    | 0.16    |
| ASA                                                  | 134 (93.1)             | 26522 (89.9)                    | 0.21    |
| ASA only                                             | 17 (11.6)              | 3096 (9.5)                      | 0.39    |
| P2Y <sub>12</sub> -inhibitor                         | 123 (85.4)             | 24871 (84.3)                    | 0.72    |
| DAPT                                                 | 117 (81.3)             | 23418 (79.4)                    | 0.59    |
| OAC                                                  | 13 (8.8)               | 3935 (12.2)                     | 0.22    |
| Statins                                              | 110 (76.4)             | 27036 (91.7)                    | <0.01   |

Version: 2021-11-14

ACE-I= Angiotensin Converting Enzyme Inhibitor, ASA= Acetylsalicylic Acid, ARB= Angiotensin Receptor Blocker, DAPT= Dual Antiplatelet Therapy, MI= Myocardial Infarction, OAC= Oral Anticoagulant, OCT/IVUS= Optical Coherence Tomography/Intravascular Ultrasound, PCI= Percutaneous Coronary Intervention, SCAD= Spontaneous Coronary Artery Dissection, STEMI= ST-segment Elevation Myocardial Infarction, \*Subjective assessment by the operator. The operator has reached the main aim of the treatment.

Management stratified by type of dissection is presented in Supplementary Table 2.

### Inpatient care time and medical treatment at discharge

There was no difference in days of hospitalisation during index event between the two groups, with a median of 4 days,  $p=0.93$ .

The use of betablockers, ASA, P2Y<sub>12</sub>-inhibitors, DAPT and oral anticoagulants (OACs) was similar between the groups at discharge. SCAD patients received DAPT in 81.3% while 11.6% received ASA only and 2.7% received no antiplatelet therapy. Non-SCAD MI patients received more often ACE-I/ARBs and statins at discharge, yet statins were prescribed in 76.4% of SCAD cases. (Table 2, Figure 2)

### Outcomes

Median follow up time for MACE was 17.3 months. There was no difference in rate of combined outcomes between the SCAD and the non-SCAD MI groups (10.9 and 13.4%,  $p=0.75$ ). (Table 3, Figure 3)

Table 3. Outcome in SCAD and non-SCAD myocardial infarction

|                               | SCAD MI<br>n=147<br>n (%) | Non-SCAD MI<br>n=32601<br>n (%) | p-value |
|-------------------------------|---------------------------|---------------------------------|---------|
| Death                         | 4 (2.7)                   | 3099 (9.7)                      | <0.01   |
| MI                            | 3 (2.0)                   | 1424 (4.4)                      | 0.20    |
| Acute coronary re-angiography | 14 (9.5)                  | 1495 (4.6)                      | <0.01   |

Version: 2021-11-14

|                                                                          |  |  |  |
|--------------------------------------------------------------------------|--|--|--|
| after discharge                                                          |  |  |  |
| MI= Myocardial Infarction, SCAD= Spontaneous Coronary Artery Dissection, |  |  |  |

Outcomes in SCAD subtypes are presented in Supplementary Table 3.

Median number of days to outcomes was 10 for SCAD and 25 for non-SCAD MI. The rate of all-cause mortality in SCAD (2.7%) was lower when compared to the non-SCAD MI population (9.7%) ( $p<0.01$ ). There was no difference in the rate of re-infarction between the SCAD (2.0%) and the non-SCAD MI population (4.4%) ( $p=0.20$ ). Median number of days until re-infarction in SCAD patients was 37 days. Median time to acute re-angiography was 12 (IQR: 127.5) days in the SCAD group and 14 (IQR: 208) days in the non-SCAD group which was statistically non-significant. The SCAD population was more often subject to acute re-angiography after the index event (9.5%) than the non-SCAD MI population (4.6%) ( $p<0.01$ ). (Table 3)

## Discussion

In this study with 100% nationwide coverage of MI patients undergoing coronary angiography during a two year period we found an incidence of SCAD at 0.74 cases per 100.000 inhabitants per year and a SCAD prevalence of 0.43% of all MI cases in Sweden at the time. The prevalence of SCAD in the MI population <50 years was 2.2% and 7.3% of MI cases in women <50 years. We found an equally high rate of combined outcomes and recurrent MI in the two MI groups whereas SCAD patients were more often subject to acute coronary re-angiography. Although 59.9% were treated conservatively without PCI or CABG, 81.3% of SCAD patients were discharged with DAPT.

Version: 2021-11-14

## Epidemiology

While the prevalence of SCAD was lower than most other studies have suggested, we found a higher prevalence of SCAD than previously published multicenter studies. (20-22) An older study of 32 869 patients from 3 centers in western Denmark identified a SCAD prevalence of 0.2% during 8 years whereas a Japanese study of 20 195 MI patients collected in 20 centers during 13 years identified a SCAD prevalence of 0.31%. (20-22) Our results are in concordance with the recently published meta-analysis by Franke et al (23) including more than 2000 patients. In addition, we did not exclude patients with angiographic signs of atherosclerosis in other than SCAD vessels. On the other hand, when comparing with smaller single center studies, the prevalence in our cohort is lower. This might be attributed to the relatively new SCAD variable in SCAAR with an increasing learning curve among interventionists to recognise and report all types of SCAD in the SCAAR registry. Thus, a certain underdiagnosis may have caused a lower degree of identification of SCAD cases than in centers with special interest in SCAD.

We also found a lower prevalence of SCAD in female MI patients <50 years (7.3%) compared to previous studies. Four studies have reported a SCAD prevalence of 23-36% in women below 50-60 years with MI. Three of these are small single center studies including  $\leq 20$  SCAD cases less than 60 years. (1, 20, 21) The fourth by Nakashima et. al. reported a SCAD prevalence of 35% in women <50 years with MI. (11) This is in contrast to our findings and we speculate it to be related to genetic variations and a low prevalence of CAD in Japan.

Version: 2021-11-14

## Risk factors

Our results are in line with previous studies showing that SCAD predominantly affects middle-aged women with a low prevalence of cardiovascular risk factors and ongoing cardiovascular medications.(1, 2, 4, 9, 11, 12, 14, 18, 20) Interestingly, 10% of SCAD cases included in our study had suffered a previous MI. This may be explained by SCAD recurrency as we do not know if the indexed SCAD occasion was the first. Rate of recurrency has been described to be between 4.7-17% in 2-4 years which aligns with our findings. (11, 12, 14) Other possible explanations are inclusion of patients with concurrent atherosclerosis in other coronary segments than the one affected by SCAD.

## Sex

Our SCAD population included 25% men which is in contrast to previous studies - in particular to those where SCAD patients with atherosclerosis have been excluded.(1, 9, 11) However, there are studies with a proportion of male patients between 23% and 46.2%.(21, 22) A consequence of excluding all SCAD patients with any atherosclerosis is the selection of younger and female patients, with a low burden of concomitant co-morbidity. When describing findings from imaging, genetic or proteomic studies there could be a rationale to select patients with a clear-cut SCAD diagnosis. On the other hand, when describing incidence, prevalence, management and prognosis, it is of great importance not to introduce a selection bias by excluding patients with concomitant atherosclerotic manifestations. The current study included all patients with SCAD unless iatrogenic or due to plaque rupture and hence describes the entire SCAD population without selection. Our results indicate that also men are, to a larger extent than previously thought, affected by SCAD, and that the diagnosis should not be overlooked but sought after in these patients too.



Version: 2021-11-14

## Angiography and intervention

Type 2 dissection was the most common angiographic manifestation, in accordance with previous studies, followed by type 1, however only seen in 12.2% as opposed to 29-55% in previous reports. Meanwhile, the prevalence of type 3 was similar between this and other studies.(1, 4, 9, 11) This indicates that intimal flap appearance and dual lumen sign is less prevalent than previously suggested, probably due to increasing recognition of non-classical appearance of SCAD. Although intravascular imaging was more widely used in SCAD patients, a majority of type 3 and 4 SCAD cases were diagnosed without using OCT/IVUS. As type 3 is defined as angiographically indistinguishable from atherosclerotic coronary artery disease, diagnosing type 3 without intravascular imaging is a limitation in this study.

There are several feasible reasons for this, including technical difficulties in the case of distal occlusions or ignorance of its necessity. In addition, the diagnosis of SCAD mimicking CAD does not always require intravascular imaging but can be made with enough experience without arduous catheterisation.

SCAD patients underwent PCI and stenting less frequently at the index event than non-SCAD MI patients, although PCI was attempted in 40% of cases and 30% received stents. Other retrospective studies of SCAD patients have reported revascularisation rates between 12-56%.(4, 5, 9, 11, 24) As there are no RCTs describing optimal management, we cannot comment on over- or undertreatment. Nor do we have information regarding the clinical circumstances underlying choice of treatment e.g., PCI on vital indication in hemodynamically unstable patients.

Version: 2021-11-14

## Medication

We found the medication at discharge to be remarkably similar in patients with SCAD and non-SCAD MI, including the use of ASA, P2Y<sub>12</sub>-inhibitors and DAPT. This might reflect adherence to current guidelines for ACS in the absence of SCAD specific evidence. (6, 7) In the current study 80% of SCAD patients were treated with betablockers, which has been proposed to be beneficial.(15) In a retrospective study of 327 patients the use of betablockers was associated with a lower risk of recurrent SCAD and this therapy could therefore be considered. (6, 7) The prescription rate of statins was high in SCAD patients, despite not being recommended. (6, 7). Our findings thus reflect the lack of familiarity that most cardiologists may have had with managing SCAD, especially prior to 2018, which is the period when our patients were included.

## Outcomes

The overall rate of outcomes did not differ between SCAD and non-SCAD MI. However, all-cause mortality was lower in SCAD, yet the rate of recurrent MI was equal. Furthermore, SCAD patients were more often subject to acute coronary re-angiography after the index event, 9.5%. This is evidence of significant morbidity in SCAD, especially as age and cardiovascular risk factors have not been adjusted for, due to the relatively small study population with SCAD. In 3 recently published European SCAD-studies (16-18) the unplanned re-angiography was 4%, 8.5% and 5.3% respectively. The present study found a death rate of 2.7% after a median follow-up of 17.3 months indicating a higher mortality than in previous studies. This could be caused by inclusion of a more representative and unselected population of SCAD patients.

Version: 2021-11-14

1  
2  
3 Although recurrent MI was equal between the two groups, our 2% recurrency rate is lower  
4  
5 than previously described, varying between 4.8-12% per year.(11, 15) SCAD recurrency has  
6  
7 been reported at 4.7-17% in 22-47 months. (11, 12, 14) The discrepancy between our study  
8  
9 and the American and Canadian series is however small and may be due to different lengths  
10  
11 of follow-up as adverse events may not be evenly distributed in time. (12, 15)  
12  
13

14  
15 The cause of the high rate of acute, unplanned coronary re-angiography after the index event  
16  
17 is not known to us and is not explained by recurrent MI or need for revascularization as PCI  
18  
19 was attempted in only 5/14 acute coronary re-angiographies. Further studies are needed to  
20  
21 elucidate this, although it is plausible that a high prevalence of recurrent angina and  
22  
23 difficulties in chest pain risk assessment could be contributing factors.  
24  
25

### 26 27 **Strengths and limitations** 28

29  
30 This study has identified all patients in Sweden considered having SCAD during the study  
31  
32 period, and all centers performing invasive coronary angiography are represented. All  
33  
34 angiographies where SCAD has been reported in the SCAAR registry have been reviewed and  
35  
36 validated by an independent interventional cardiologist. All data regarding demographics,  
37  
38 management, treatment and in-hospital outcomes are immediately registered on-line, thus  
39  
40 limiting recall bias and missing values as these variables are compulsory to register.  
41  
42

43  
44 Limitations of this study include possible heterogeneity in the confirmation of SCAD  
45  
46 diagnosis as the study did not include a core-lab. Segment distribution in SCAAR in  
47  
48 angiography alone is not compulsory, therefore it is missing information in many SCAD  
49  
50 patients. A segment analysis was not done. The occurrence of FMD was not available.  
51  
52

53  
54 Additionally, data that could not be derived from angiographic re-evaluation was derived  
55  
56 from registries. Predictors of MACE were not analysed in this small population.  
57  
58

### 59 **Conclusion** 60

Version: 2021-11-14

1  
2  
3 SCAD patients were comparatively young and previously healthy, yet suffered substantial  
4 mortality and morbidity and are frequently subject to acute coronary re-angiography and its  
5 accompanying risks. As both incidence and prevalence are low, data highlight the careful  
6 need of diagnostic awareness in both men and women and in patients with co-existing  
7 atherosclerotic coronary artery disease.  
8  
9  
10  
11  
12  
13  
14  
15

## 16 Author statement

17  
18 H Wilander, S Sederholm Lawesson, D Venetsanos and E Swahn are responsible for the conception  
19 and design of the study, have full access to all data, analysed and interpreted the data and drafted  
20 the manuscript. C Pagonis gathered the PCI data, critically revised the manuscript and added  
21 important intellectual content. C Dworeck, L Jonasson, N Johnston, T Kellerth, P Tornvall and T  
22 Yndigejn critically revised the manuscript and added important intellectual content.  
23  
24  
25  
26  
27  
28  
29  
30

## 31 Funding

32  
33 This work was supported by Östergötland County Council (LIO-701071, E.S.) and the Swedish  
34 Heart and Lung foundation (nr. 20190379, E.S).  
35  
36  
37

## 38 Acknowledgements

39  
40 The authors gratefully acknowledge all the participating PCI centers in Sweden.  
41  
42  
43  
44

## 45 Impact on daily practice

46  
47  
48 As knowledge is very scarce regarding SCAD-patients, a nationwide study on all-comers like this,  
49 reflects the lack of familiarity that most cardiologists may have had with managing SCAD,  
50 especially prior to 2018. Based on the findings of this observational study, a continued effort to  
51 increase the knowledge, awareness and reporting of SCAD in our national quality registry  
52 (SCAAR) through randomised registry clinical trials (RRCT) is ongoing. The authors believe that  
53 this will change current practice in Sweden in the coming years.  
54  
55  
56  
57  
58  
59  
60

Version: 2021-11-14

## Disclosure

The Authors declare that there are no conflicts of interest.

## Data availability statement

The data underlying this article will be shared on reasonable request to the corresponding author.

For peer review only

Version: 2021-11-14

## References

1. Rashid HN, Wong DT, Wijesekera H, Gutman SJ, Shanmugam VB, Gulati R, et al. Incidence and characterisation of spontaneous coronary artery dissection as a cause of acute coronary syndrome--A single-centre Australian experience. *International journal of cardiology*. 2016;202:336-8.
2. Saw J, Ricci D, Starovoytov A, Fox R, Buller CE. Spontaneous coronary artery dissection: prevalence of predisposing conditions including fibromuscular dysplasia in a tertiary center cohort. *JACC Cardiovasc Interv*. 2013;6(1):44-52.
3. Maehara A, Mintz GS, Castagna MT, Pichard AD, Satler LF, Waksman R, et al. Intravascular ultrasound assessment of spontaneous coronary artery dissection. *The American journal of cardiology*. 2002;89(4):466-8.
4. Rogowski S, Maeder MT, Weilenmann D, Haager PK, Ammann P, Rohner F, et al. Spontaneous Coronary Artery Dissection: Angiographic Follow-Up and Long-Term Clinical Outcome in a Predominantly Medically Treated Population. *Catheterization and cardiovascular interventions : official journal of the Society for Cardiac Angiography & Interventions*. 2017;89(1):59-68.
5. Tweet MS, Eleid MF, Best PJ, Lennon RJ, Lerman A, Rihal CS, et al. Spontaneous coronary artery dissection: revascularization versus conservative therapy. *Circulation Cardiovascular interventions*. 2014;7(6):777-86.
6. Adlam D, Alfonso F, Maas A, Vrints C, Writing C. European Society of Cardiology, acute cardiovascular care association, SCAD study group: a position paper on spontaneous coronary artery dissection. *Eur Heart J*. 2018;39(36):3353-68.
7. Hayes SN, Kim ESH, Saw J, Adlam D, Arslanian-Engoren C, Economy KE, et al. Spontaneous Coronary Artery Dissection: Current State of the Science: A Scientific Statement From the American Heart Association. *Circulation*. 2018;137(19):e523-e57.
8. Persu A, Giavarini A, Touze E, Januszewicz A, Sapoval M, Azizi M, et al. European consensus on the diagnosis and management of fibromuscular dysplasia. *J Hypertens*. 2014;32(7):1367-78.
9. Saw J, Aymong E, Sedlak T, Buller CE, Starovoytov A, Ricci D, et al. Spontaneous coronary artery dissection: association with predisposing arteriopathies and precipitating stressors and cardiovascular outcomes. *Circulation Cardiovascular interventions*. 2014;7(5):645-55.
10. Prakash R, Starovoytov A, Heydari M, Mancini GB, Saw J. Catheter-Induced Iatrogenic Coronary Artery Dissection in Patients With Spontaneous Coronary Artery Dissection. *JACC Cardiovascular interventions*. 2016;9(17):1851-3.
11. Nakashima T, Noguchi T, Haruta S, Yamamoto Y, Oshima S, Nakao K, et al. Prognostic impact of spontaneous coronary artery dissection in young female patients with acute myocardial infarction: A report from the Angina Pectoris-Myocardial Infarction Multicenter Investigators in Japan. *Int J Cardiol*. 2016;207:341-8.
12. Tweet MS, Hayes SN, Pitta SR, Simari RD, Lerman A, Lennon RJ, et al. Clinical features, management, and prognosis of spontaneous coronary artery dissection. *Circulation*. 2012;126(5):579-88.
13. Main A, Prakash R, Starovoytov A, Sabbaghan A, Aymong E, Mancini GB, et al. Characteristics of extension and de novo recurrent spontaneous coronary artery dissection. *EuroIntervention : journal of EuroPCR in collaboration with the Working Group on Interventional Cardiology of the European Society of Cardiology*. 2017;13(12):e1454-e9.
14. Lettieri C, Zavalloni D, Rossini R, Morici N, Etti F, Leonzi O, et al. Management and Long-Term Prognosis of Spontaneous Coronary Artery Dissection. *The American journal of cardiology*. 2015;116(1):66-73.
15. Saw J, Humphries K, Aymong E, Sedlak T, Prakash R, Starovoytov A, et al. Spontaneous Coronary Artery Dissection: Clinical Outcomes and Risk of Recurrence. *Journal of the American College of Cardiology*. 2017;70(9):1148-58.

Version: 2021-11-14

16. Mori R, Macaya F, Giacobbe F, Salinas P, Pavani M, Boi A, et al. Clinical outcomes by angiographic type of spontaneous coronary artery dissection. *EuroIntervention*. 2021;17(6):516-24.
17. Combaret N, Gerbaud E, Derimay F, Souteyrand G, Cassagnes L, Bouajila S, et al. National French registry of spontaneous coronary artery dissections: prevalence of fibromuscular dysplasia and genetic analyses. *EuroIntervention*. 2021;17(6):508-15.
18. Garcia-Guimaraes M, Bastante T, Macaya F, Roura G, Sanz R, Barahona Alvarado JC, et al. Spontaneous coronary artery dissection in Spain: clinical and angiographic characteristics, management, and in-hospital events. *Rev Esp Cardiol (Engl Ed)*. 2021;74(1):15-23.
19. Jernberg T, Attebring MF, Hambraeus K, Ivert T, James S, Jeppsson A, et al. The Swedish Web-system for enhancement and development of evidence-based care in heart disease evaluated according to recommended therapies (SWEDEHEART). *Heart*. 2010;96(20):1617-21.
20. Vanzetto G, Berger-Coz E, Barone-Rochette G, Chavanon O, Bouvaist H, Hacini R, et al. Prevalence, therapeutic management and medium-term prognosis of spontaneous coronary artery dissection: results from a database of 11,605 patients. *Eur J Cardiothorac Surg*. 2009;35(2):250-4.
21. Mortensen KH, Thuesen L, Kristensen IB, Christiansen EH. Spontaneous coronary artery dissection: a Western Denmark Heart Registry study. *Catheterization and cardiovascular interventions : official journal of the Society for Cardiac Angiography & Interventions*. 2009;74(5):710-7.
22. Nishiguchi T, Tanaka A, Ozaki Y, Taruya A, Fukuda S, Taguchi H, et al. Prevalence of spontaneous coronary artery dissection in patients with acute coronary syndrome. *Eur Heart J Acute Cardiovasc Care*. 2016;5(3):263-70.
23. Franke KB, Nerlekar N, Marshall H, Psaltis PJ. Systematic review and meta-analysis of the clinical characteristics and outcomes of spontaneous coronary artery dissection. *Int J Cardiol*. 2021;322:34-9.
24. Alfonso F, Paulo M, Lennie V, Dutary J, Bernardo E, Jimenez-Quevedo P, et al. Spontaneous coronary artery dissection: long-term follow-up of a large series of patients prospectively managed with a "conservative" therapeutic strategy. *JACC Cardiovasc Interv*. 2012;5(10):1062-70.

Version: 2021-11-14

1  
2  
3 **Figure legends**  
4

5 **Figure 1. Distribution of SCAD subtypes.**

6  
7 **Figure 2. Medical therapy at discharge.**

8  
9 **Figure 3. Outcomes in SCAD and non-SCAD MI.**  
10  
11  
12  
13  
14  
15  
16  
17  
18  
19  
20  
21  
22  
23  
24  
25  
26  
27  
28  
29  
30  
31  
32  
33  
34  
35  
36  
37  
38  
39  
40  
41  
42  
43  
44  
45  
46  
47  
48  
49  
50  
51  
52  
53  
54  
55  
56  
57  
58  
59  
60

For peer review only



1  
2  
3  
4  
5  
6  
7  
8  
9  
10  
11  
12  
13  
14  
15  
16  
17  
18  
19  
20  
21  
22  
23  
24  
25  
26  
27  
28  
29  
30  
31  
32  
33  
34  
35  
36  
37  
38  
39  
40  
41  
42  
43  
44  
45  
46  
47  
48  
49  
50  
51  
52  
53  
54  
55  
56  
57  
58  
59  
60

Figure 1.

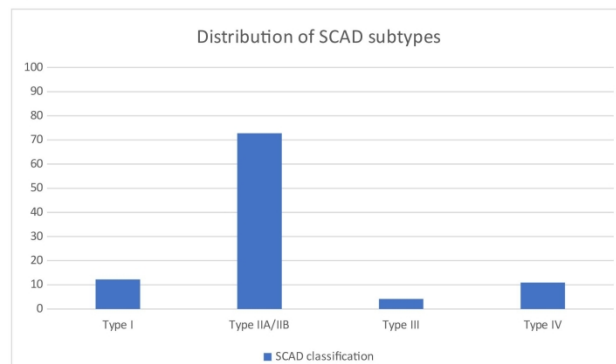

Figure 1

209x297mm (300 x 300 DPI)

1  
2  
3  
4  
5  
6  
7  
8  
9  
10  
11  
12  
13  
14  
15  
16  
17  
18  
19  
20  
21  
22  
23  
24  
25  
26  
27  
28  
29  
30  
31  
32  
33  
34  
35  
36  
37  
38  
39  
40  
41  
42  
43  
44  
45  
46  
47  
48  
49  
50  
51  
52  
53  
54  
55  
56  
57  
58  
59  
60

Figure 2.

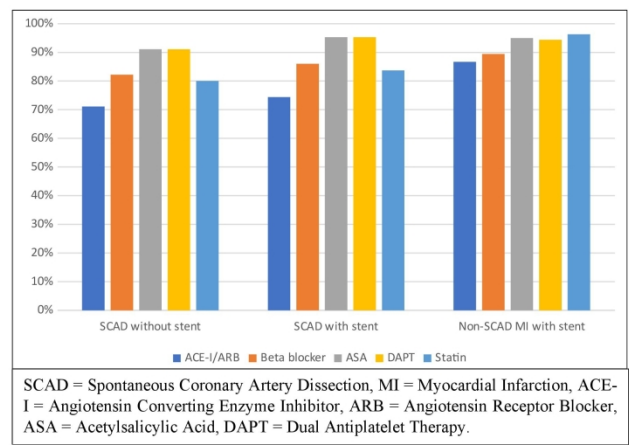

Figure 2

209x297mm (300 x 300 DPI)

1  
2  
3  
4  
5  
6  
7  
8  
9  
10  
11  
12  
13  
14  
15  
16  
17  
18  
19  
20  
21  
22  
23  
24  
25  
26  
27  
28  
29  
30  
31  
32  
33  
34  
35  
36  
37  
38  
39  
40  
41  
42  
43  
44  
45  
46  
47  
48  
49  
50  
51  
52  
53  
54  
55  
56  
57  
58  
59  
60

Figure 3.

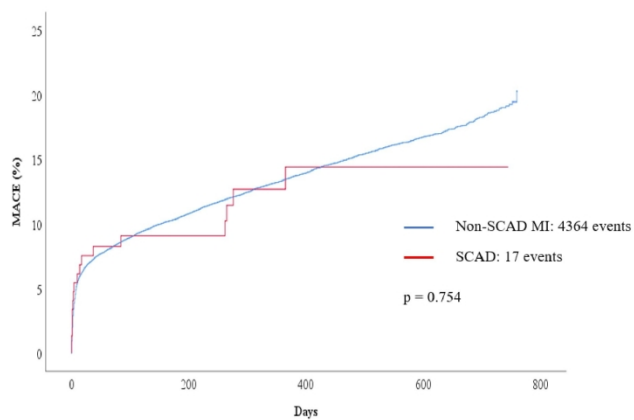

| Number at risk |       |       |       |      |
|----------------|-------|-------|-------|------|
| ■              | 32601 | 21444 | 13178 | 5926 |
| ■              | 147   | 88    | 47    | 19   |

MACE = Major Adverse Cardiac Events, SCAD = Spontaneous Coronary Artery Dissection, MI = Myocardial Infarction.

Figure 3

209x297mm (300 x 300 DPI)

## SweSCAD: Supplementary tables and figures

Supplementary Table 1. Saw angiographic classification of SCAD

|                 | Classification                                                                                                                                                                                                                                            |
|-----------------|-----------------------------------------------------------------------------------------------------------------------------------------------------------------------------------------------------------------------------------------------------------|
| SCAD type 1     | The classical angiographic radiolucent ‘flap’ and linear double lumen.                                                                                                                                                                                    |
| SCAD type 2a/2b | A long diffuse and smooth stenosis predominantly located in mid-to-distal segments, and classical signs of a dissection as in Type 1 are missing; Type 2a: Distal vessel normal; Type 2b: The stenosis extends angiographically to the end of the vessel. |
| SCAD type 3     | Angiographically indistinguishable from a focal atherosclerotic stenosis requiring diagnostic confirmation by OCT or IVUS.                                                                                                                                |
| SCAD type 4     | Total occlusion. The diagnosis established once coronary flow is re-established or inferred by subsequent vessel healing and the exclusion of an embolic cause.                                                                                           |

Supplementary Table 2. Coronary angiography and invasive management in SCAD subtypes

|                        | Saw Classification<br>(index event) | I<br>n=18 (%) | IIA/IIB<br>n=107 (%) | III<br>n=6 (%) | IV<br>n=16 (%) |
|------------------------|-------------------------------------|---------------|----------------------|----------------|----------------|
| Diagnostic<br>features | STEMI                               | 7 (38.9)      | 47 (43.9)            | 5 (83.3)       | 11 (68.8)      |
|                        | OCT/IVUS used                       | 4 (22.2)      | 26 (24.3)            | 2 (33.3)       | 4 (25.0)       |
| Invasive<br>management | Conservative management             | 13 (72.2)     | 67 (62.6)            | 5 (83.3)       | 3 (18.8)       |
|                        | Attempted PCI                       | 5 (27.8)      | 40 (37.4)            | 1 (16.7)       | 13 (81.3)      |
|                        | PCI with stent                      | 5 (27.8)      | 31 (29.0)            | 1 (16.7)       | 8 (50.0)       |
|                        | General success*                    | 4 (80)        | 35 (87.5)            | 1 (100%)       | 11 (84.6)      |

MI= Myocardial Infarction, OCT/IVUS= Optical Coherence Tomography / IntraVascular UltraSound, PCI= Percutaneous Coronary Intervention, SCAD= Spontaneous Coronary Artery Dissection, STEMI= ST-segment Elevation Myocardial Infarction.  
\*Subjective assessment by the operator. The operator has reached the main aim of the treatment.

Supplementary Table 3. Outcome in SCAD subtypes

|                               | I<br>n=18 (%) | IIA/IIB<br>n=107 (%) | III<br>n=6 (%) | IV<br>n=16 (%) |
|-------------------------------|---------------|----------------------|----------------|----------------|
| Death                         | 2 (11.1)      | 0 (0)                | 0 (0)          | 2 (12.5)       |
| MI                            | 0 (0)         | 3 (2.8)              | 0 (0)          | 0 (0)          |
| Acute coronary re-angiography | 1 (5.5)       | 10 (9.3)             | 1 (16.7)       | 2 (12.5)       |

MI = Myocardial Infarction, SCAD = Spontaneous Coronary Artery Dissection,

For peer review only

STROBE Statement—Checklist of items that should be included in reports of *cohort studies*

|                              | Item No | Recommendation                                                                                                                                                                                    | Page No |
|------------------------------|---------|---------------------------------------------------------------------------------------------------------------------------------------------------------------------------------------------------|---------|
| <b>Title and abstract</b>    | 1       | (a) Indicate the study's design with a commonly used term in the title or the abstract                                                                                                            | 1       |
|                              |         | (b) Provide in the abstract an informative and balanced summary of what was done and what was found                                                                                               | 2       |
| <b>Introduction</b>          |         |                                                                                                                                                                                                   |         |
| Background/rationale         | 2       | Explain the scientific background and rationale for the investigation being reported                                                                                                              | 4-5     |
| Objectives                   | 3       | State specific objectives, including any prespecified hypotheses                                                                                                                                  | 5       |
| <b>Methods</b>               |         |                                                                                                                                                                                                   |         |
| Study design                 | 4       | Present key elements of study design early in the paper                                                                                                                                           | 5       |
| Setting                      | 5       | Describe the setting, locations, and relevant dates, including periods of recruitment, exposure, follow-up, and data collection                                                                   | 5       |
| Participants                 | 6       | (a) Give the eligibility criteria, and the sources and methods of selection of participants. Describe methods of follow-up                                                                        | 5-6     |
|                              |         | (b) For matched studies, give matching criteria and number of exposed and unexposed                                                                                                               | NA      |
| Variables                    | 7       | Clearly define all outcomes, exposures, predictors, potential confounders, and effect modifiers. Give diagnostic criteria, if applicable                                                          | 6-7     |
| Data sources/<br>measurement | 8*      | For each variable of interest, give sources of data and details of methods of assessment (measurement). Describe comparability of assessment methods if there is more than one group              | 5-6     |
| Bias                         | 9       | Describe any efforts to address potential sources of bias                                                                                                                                         | 14      |
| Study size                   | 10      | Explain how the study size was arrived at                                                                                                                                                         | NA      |
| Quantitative variables       | 11      | Explain how quantitative variables were handled in the analyses. If applicable, describe which groupings were chosen and why                                                                      | 7       |
| Statistical methods          | 12      | (a) Describe all statistical methods, including those used to control for confounding                                                                                                             | 7       |
|                              |         | (b) Describe any methods used to examine subgroups and interactions                                                                                                                               |         |
|                              |         | (c) Explain how missing data were addressed                                                                                                                                                       |         |
|                              |         | (d) If applicable, explain how loss to follow-up was addressed                                                                                                                                    |         |
|                              |         | (e) Describe any sensitivity analyses                                                                                                                                                             |         |
| <b>Results</b>               |         |                                                                                                                                                                                                   |         |
| Participants                 | 13*     | (a) Report numbers of individuals at each stage of study—eg numbers potentially eligible, examined for eligibility, confirmed eligible, included in the study, completing follow-up, and analysed | 7       |
|                              |         | (b) Give reasons for non-participation at each stage                                                                                                                                              |         |
|                              |         | (c) Consider use of a flow diagram                                                                                                                                                                |         |
| Descriptive data             | 14*     | (a) Give characteristics of study participants (eg demographic, clinical, social) and information on exposures and potential confounders                                                          | 7-8     |
|                              |         | (b) Indicate number of participants with missing data for each variable of interest                                                                                                               | 7       |
|                              |         | (c) Summarise follow-up time (eg, average and total amount)                                                                                                                                       | 9       |
| Outcome data                 | 15*     | Report numbers of outcome events or summary measures over time                                                                                                                                    | 9       |

|    |                          |    |                                                                                                                                                                                                              |       |
|----|--------------------------|----|--------------------------------------------------------------------------------------------------------------------------------------------------------------------------------------------------------------|-------|
| 1  | Main results             | 16 | (a) Give unadjusted estimates and, if applicable, confounder-adjusted estimates and their precision (eg, 95% confidence interval). Make clear which confounders were adjusted for and why they were included | 9     |
| 2  |                          |    | (b) Report category boundaries when continuous variables were categorized                                                                                                                                    | NA    |
| 3  |                          |    | (c) If relevant, consider translating estimates of relative risk into absolute risk for a meaningful time period                                                                                             | NA    |
| 4  |                          |    |                                                                                                                                                                                                              |       |
| 5  |                          |    |                                                                                                                                                                                                              |       |
| 6  |                          |    |                                                                                                                                                                                                              |       |
| 7  |                          |    |                                                                                                                                                                                                              |       |
| 8  |                          |    |                                                                                                                                                                                                              |       |
| 9  | Other analyses           | 17 | Report other analyses done—eg analyses of subgroups and interactions, and sensitivity analyses                                                                                                               | NA    |
| 10 |                          |    |                                                                                                                                                                                                              |       |
| 11 | <b>Discussion</b>        |    |                                                                                                                                                                                                              |       |
| 12 |                          |    |                                                                                                                                                                                                              |       |
| 13 | Key results              | 18 | Summarise key results with reference to study objectives                                                                                                                                                     | 10    |
| 14 | Limitations              | 19 | Discuss limitations of the study, taking into account sources of potential bias or imprecision. Discuss both direction and magnitude of any potential bias                                                   | 14    |
| 15 |                          |    |                                                                                                                                                                                                              |       |
| 16 | Interpretation           | 20 | Give a cautious overall interpretation of results considering objectives, limitations, multiplicity of analyses, results from similar studies, and other relevant evidence                                   | 10-14 |
| 17 |                          |    |                                                                                                                                                                                                              |       |
| 18 |                          |    |                                                                                                                                                                                                              |       |
| 19 | Generalisability         | 21 | Discuss the generalisability (external validity) of the study results                                                                                                                                        | 14    |
| 20 |                          |    |                                                                                                                                                                                                              |       |
| 21 | <b>Other information</b> |    |                                                                                                                                                                                                              |       |
| 22 | Funding                  | 22 | Give the source of funding and the role of the funders for the present study and, if applicable, for the original study on which the present article is based                                                | 15    |
| 23 |                          |    |                                                                                                                                                                                                              |       |
| 24 |                          |    |                                                                                                                                                                                                              |       |

25  
26 \*Give information separately for exposed and unexposed groups.

27  
28 **Note:** An Explanation and Elaboration article discusses each checklist item and gives methodological background and  
29 published examples of transparent reporting. The STROBE checklist is best used in conjunction with this article (freely  
30 available on the Web sites of PLoS Medicine at <http://www.plosmedicine.org/>, Annals of Internal Medicine at  
31 <http://www.annals.org/>, and Epidemiology at <http://www.epidem.com/>). Information on the STROBE Initiative is  
32 available at <http://www.strobe-statement.org>.  
33  
34  
35  
36  
37  
38  
39  
40  
41  
42  
43  
44  
45  
46  
47  
48  
49  
50  
51  
52  
53  
54  
55  
56  
57  
58  
59  
60
