# Supplementary material for: Nationwide observational study of incidence, management and outcome of spontaneous coronary artery dissection: a report from the Swedish Coronary Angiography and Angioplasty register
Source: PubMed Central journal article supplement — BMJ Open. 2022 Jun 1;12(6):e060949. doi: 10.1136/bmjopen-2022-060949 (PMC9161068; doi:10.1136/bmjopen-2022-060949), 2022-06-01
Supplement: bmjopen-2022-060949supp001.pdf [file bmjopen-2022-060949supp001.pdf]

## SweSCAD: Supplementary tables and figures

Supplementary Table 1. Saw angiographic classification of SCAD

|                 | Classification                                                                                                                                                                                                                                            |
|-----------------|-----------------------------------------------------------------------------------------------------------------------------------------------------------------------------------------------------------------------------------------------------------|
| SCAD type 1     | The classical angiographic radiolucent ‘flap’ and linear double lumen.                                                                                                                                                                                    |
| SCAD type 2a/2b | A long diffuse and smooth stenosis predominantly located in mid-to-distal segments, and classical signs of a dissection as in Type 1 are missing; Type 2a: Distal vessel normal; Type 2b: The stenosis extends angiographically to the end of the vessel. |
| SCAD type 3     | Angiographically indistinguishable from a focal atherosclerotic stenosis requiring diagnostic confirmation by OCT or IVUS.                                                                                                                                |
| SCAD type 4     | Total occlusion. The diagnosis established once coronary flow is re-established or inferred by subsequent vessel healing and the exclusion of an embolic cause.                                                                                           |

Supplementary Table 2. Coronary angiography and invasive management in SCAD subtypes

|                                                                                                                                                                                                                                                                                                                                                               | Saw Classification<br>(index event) | I<br>n=18 (%) | IIA/IIB<br>n=107 (%) | III<br>n=6 (%) | IV<br>n=16 (%) |
|---------------------------------------------------------------------------------------------------------------------------------------------------------------------------------------------------------------------------------------------------------------------------------------------------------------------------------------------------------------|-------------------------------------|---------------|----------------------|----------------|----------------|
| Diagnostic features                                                                                                                                                                                                                                                                                                                                           | STEMI                               | 7 (38.9)      | 47 (43.9)            | 5 (83.3)       | 11 (68.8)      |
|                                                                                                                                                                                                                                                                                                                                                               | OCT/IVUS used                       | 4 (22.2)      | 26 (24.3)            | 2 (33.3)       | 4 (25.0)       |
| Invasive management                                                                                                                                                                                                                                                                                                                                           | Conservative management             | 13 (72.2)     | 67 (62.6)            | 5 (83.3)       | 3 (18.8)       |
|                                                                                                                                                                                                                                                                                                                                                               | Attempted PCI                       | 5 (27.8)      | 40 (37.4)            | 1 (16.7)       | 13 (81.3)      |
|                                                                                                                                                                                                                                                                                                                                                               | PCI with stent                      | 5 (27.8)      | 31 (29.0)            | 1 (16.7)       | 8 (50.0)       |
|                                                                                                                                                                                                                                                                                                                                                               | General success*                    | 4 (80)        | 35 (87.5)            | 1 (100%)       | 11 (84.6)      |
| <p>MI= Myocardial Infarction, OCT/IVUS= Optical Coherence Tomography / IntraVascular UltraSound, PCI= Percutaneous Coronary Intervention, SCAD= Spontaneous Coronary Artery Dissection, STEMI= ST-segment Elevation Myocardial Infarction.<br/>           *Subjective assessment by the operator. The operator has reached the main aim of the treatment.</p> |                                     |               |                      |                |                |

Supplementary Table 3. Outcome in SCAD subtypes

|                                                                            | I<br>n=18 (%) | IIA/IIB<br>n=107 (%) | III<br>n=6 (%) | IV<br>n=16 (%) |
|----------------------------------------------------------------------------|---------------|----------------------|----------------|----------------|
| Death                                                                      | 2 (11.1)      | 0 (0)                | 0 (0)          | 2 (12.5)       |
| MI                                                                         | 0 (0)         | 3 (2.8)              | 0 (0)          | 0 (0)          |
| Acute coronary re-angiography                                              | 1 (5.5)       | 10 (9.3)             | 1 (16.7)       | 2 (12.5)       |
| MI = Myocardial Infarction, SCAD = Spontaneous Coronary Artery Dissection, |               |                      |                |                |
